# Supplementary material for: Intra- and inter-tumor heterogeneity in a vemurafenib-resistant melanoma patient and derived xenografts
Source: PubMed Central journal article supplement (PMC4568946; doi:10.15252/emmm.201404914), 2015-06-23
Supplement: emmm0007-1104-sd1.pdf [file emmm0007-1104-sd1.pdf]

### Figure S1

Control staining for p-ERK performed on normal human skin. Here, for comparison, p-ERK stainings for M032 and M032R1 are included. Scale bar represents 100  $\mu\text{m}$ .

### Figure S2

Amplicons containing BRAF differ between distinct metastases. BRAF is amplified in three of the vemurafenib-resistant metastases (M032R1, M032R2 and M032R5), but the size of the amplicons differs among them, suggesting that the break points were established through independent events.

(A) Copy number profiles for the genomic region on chromosome 7 where *BRAF* is located. Blue lines indicate the break points of the amplicons in M032R1, which are different from those in M032R2 and M032R5. (B) Segmented  $\log_2$ ratios for the genomic region with amplification of *BRAF* in M032R1, M032R2 and M032R5. Red represents a gain, blue represents a loss.

### Figure S3

*MEK1*<sup>T55delinsRT</sup> mutation confers resistance to vemurafenib, but not to trametinib in 888mel melanoma cells.

(A) Validation of expression of pQXCIP-GFP, MEK1<sup>WT</sup> or MEK1<sup>T55delinsRT</sup> in 888mel melanoma cells by immunoblotting. (B) Dose-response curves for 888mel cells with lentivirus-encoding GFP, MEK1<sup>WT</sup> or MEK1<sup>T55delinsRT</sup> with different doses of BRAF inhibitor vemurafenib, ERK inhibitor SCH772984 or MEK inhibitor trametinib. Error bars indicated standard deviation. (C) Colony formation assays with 888mel cells, infected with GFP, MEK1<sup>WT</sup> or MEK1<sup>T55delinsRT</sup>, treated with indicated doses and inhibitors. (D) Treatment of 888mel *MEK1*<sup>T55delinsRT</sup> melanoma cells DMSO (-), 250

nM dabrafenib (D), 25 nM trametinib (T) or a combination (D+T). (E) Immunoblotting of *MEK1<sup>WT</sup>* and *MEK1<sup>T55delinsRT</sup>* 888mel melanoma cells for players of the MAPK pathway after 24h of ERK inhibitor, with doses as indicated in the figure. Phosphorylation of ERK is inhibited when using higher doses of ERK inhibitor. Normalized band densities for p-ERK and p-RSK are displayed in the graphs. (F) Immunoblotting of *MEK1<sup>WT</sup>* and *MEK1<sup>T55delinsRT</sup>* 888mel melanoma cells for players of the MAPK pathway after 24h of vemurafenib, with doses as indicated in the figure. Phosphorylation of ERK remains relatively high despite inhibition with high doses of BRAF inhibitor. Normalized band densities for p-ERK and p-RSK are displayed in the graphs.

#### Figure S4

*MEK1<sup>T55delinsRT</sup>* mutation confers resistance to vemurafenib, but not to trametinib in SKMEL-28 melanoma cells.

(A) Validation of expression of pQXCIP-GFP, *MEK1<sup>WT</sup>* or *MEK1<sup>T55delinsRT</sup>* in SKMEL-28 melanoma cells by immunoblotting. (B) Dose-response curves for SKMEL-28 cells with GFP, *MEK1<sup>WT</sup>* or *MEK1<sup>T55delinsRT</sup>* with different doses of BRAF inhibitor vemurafenib, ERK inhibitor SCH772984 or MEK inhibitor trametinib. Error bars indicated standard deviation. (C) Colony formation assays with SKMEL-28 cells, infected with lentivirus-encoding GFP, *MEK1<sup>WT</sup>* or *MEK1<sup>T55delinsRT</sup>*, treated with indicated doses and inhibitors. (D) Treatment of SKMEL-28 *MEK1<sup>T55delinsRT</sup>* melanoma cells with DMSO (-), 250 nM dabrafenib (D), 25 nM trametinib (T) or a combination (D+T). (E) Immunoblotting of *MEK1<sup>WT</sup>* and *MEK1<sup>T55delinsRT</sup>* SKMEL-28 melanoma cells for players of the MAPK pathway after 24h of ERK inhibitor, with doses as indicated in the figure. Normalized band densities for p-ERK and p-RSK are

displayed in the graphs. **(F)** Immunoblotting of *MEK1*<sup>WT</sup> and *MEK1*<sup>T55delinsRT</sup> SKMEL-28 melanoma cells for players of the MAPK pathway after 24h of vemurafenib, with doses as indicated in the figure. Normalized band densities for p-ERK and p-RSK are displayed in the graphs.

### Figure S5

Melanoma cells carrying the *MEK1*<sup>T55delinsRT</sup> mutation have hyperactivated MAPK-pathway which inhibits their growth capacity.

**(A)** Immunoblotting of *MEK1*<sup>WT</sup> and *MEK1*<sup>T55delinsRT</sup> A375 melanoma cells for players of the MAPK pathway after 24h of ERK inhibitor, with doses as indicated in the figure. Phosphorylation of ERK and RSK is inhibited when using higher doses of ERK inhibitor. Normalized band densities for p-ERK and p-RSK are displayed in the graphs. **(B)** Immunoblotting of *MEK1*<sup>WT</sup> and *MEK1*<sup>T55delinsRT</sup> A375 melanoma cells for players of the MAPK pathway after 24h of vemurafenib, with doses as indicated in the figure. Phosphorylation of both ERK and RSK remains relatively high despite inhibition with high doses of BRAF inhibitor. Normalized band densities for p-ERK and pRSK are displayed in the graphs.

### Figure S6

*MEK1*<sup>T55delinsRT</sup> mutation gives resistance to several MEK inhibitors.

**(A)** A375 melanoma cells, retrovirally transduced with GFP, *MEK1*<sup>WT</sup> and *MEK1*<sup>T55delinsRT</sup>, were treated with different doses (as indicated) of the MEK inhibitors PD-0325901, U0126 and selumetinib. **(B)** 888mel melanoma cells, retrovirally transduced with GFP, *MEK1*<sup>WT</sup> and *MEK1*<sup>T55delinsRT</sup>, were treated with different doses (as indicated) of the MEK inhibitors PD-0325901, U0126 and selumetinib. **(C)**

SKMEL-28 melanoma cells, retrovirally transduced with GFP, MEK1<sup>WT</sup> and MEK1<sup>T55delinsRT</sup>, were treated with different doses (as indicated) of the MEK inhibitors PD-0325901, U0126 and selumetinib.

### Figure S7

Heterogeneity of the BRAF amplification across different vemurafenib-resistant metastases.

(A) Stainings for BRAF<sup>V600E</sup> of the patient's pre-treatment tumor and the five resistant metastases. Staining is heterogeneous in M032R1 and M032R3, indicating that there could be several populations of tumor cells with either BRAF<sup>V600E</sup> amplification or an alternative resistance mechanism. Especially for M032R3, two different pieces of the same tumor showed a very different intensity in staining. Scale bar in upper row represents 2 mm, in the lower row 600  $\mu$ m. (B) Stainings for BRAF<sup>V600E</sup> on PDX derived from the pre-treatment tumor and four resistant metastases. Staining was very heterogeneous in one PDX derived of M032R2, which showed dispersed areas of intense and very light staining, indicating heterogeneity of the BRAF<sup>V600E</sup> amplification. Scale bar in upper row represents 2 mm, in the lower row 600  $\mu$ m. (C) An independent set of tumor fragments from the pre-treatment tumor and the five resistant metastases were taken for isolation of new gDNA to study heterogeneity of the resistance mechanisms. qPCR was performed for *BRAF*, *CRAF* and as a control *LINE*. Error bars indicated standard deviation. Data showed that BRAF was amplified in M032R2 and M032R5, but not M032R1.



**Figure S1**

normal skin

M032

M032R1

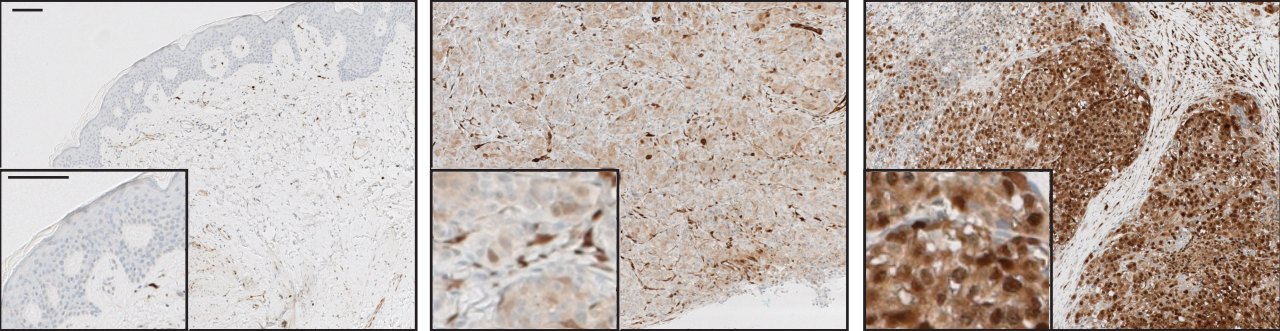

Figure S2

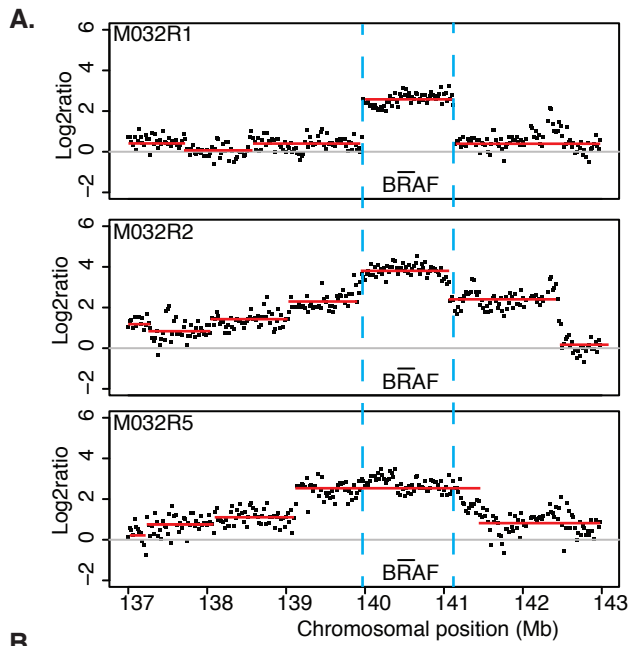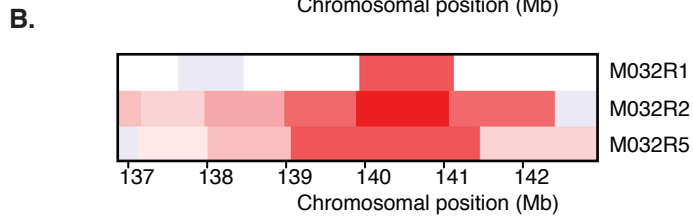

**Figure S3**

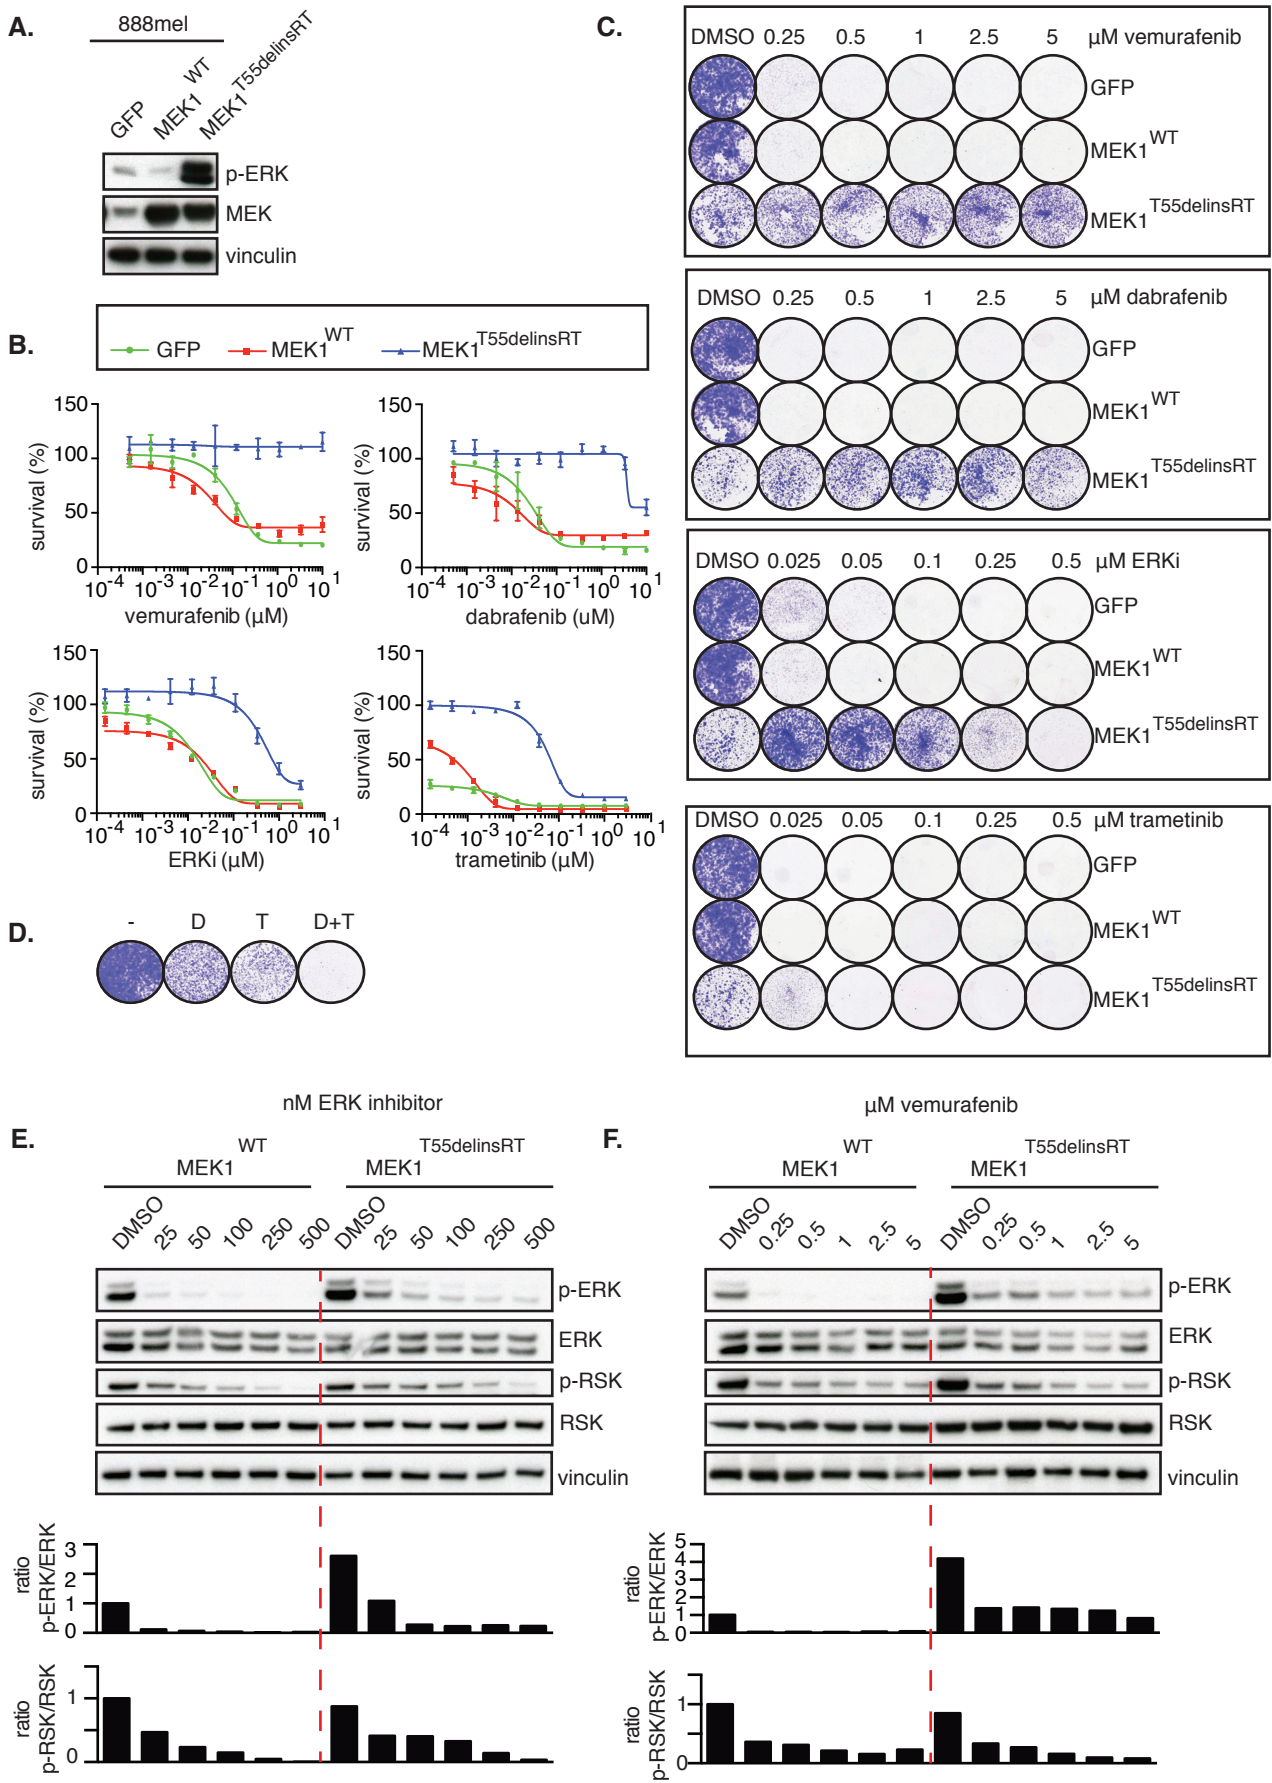

**Figure S4**

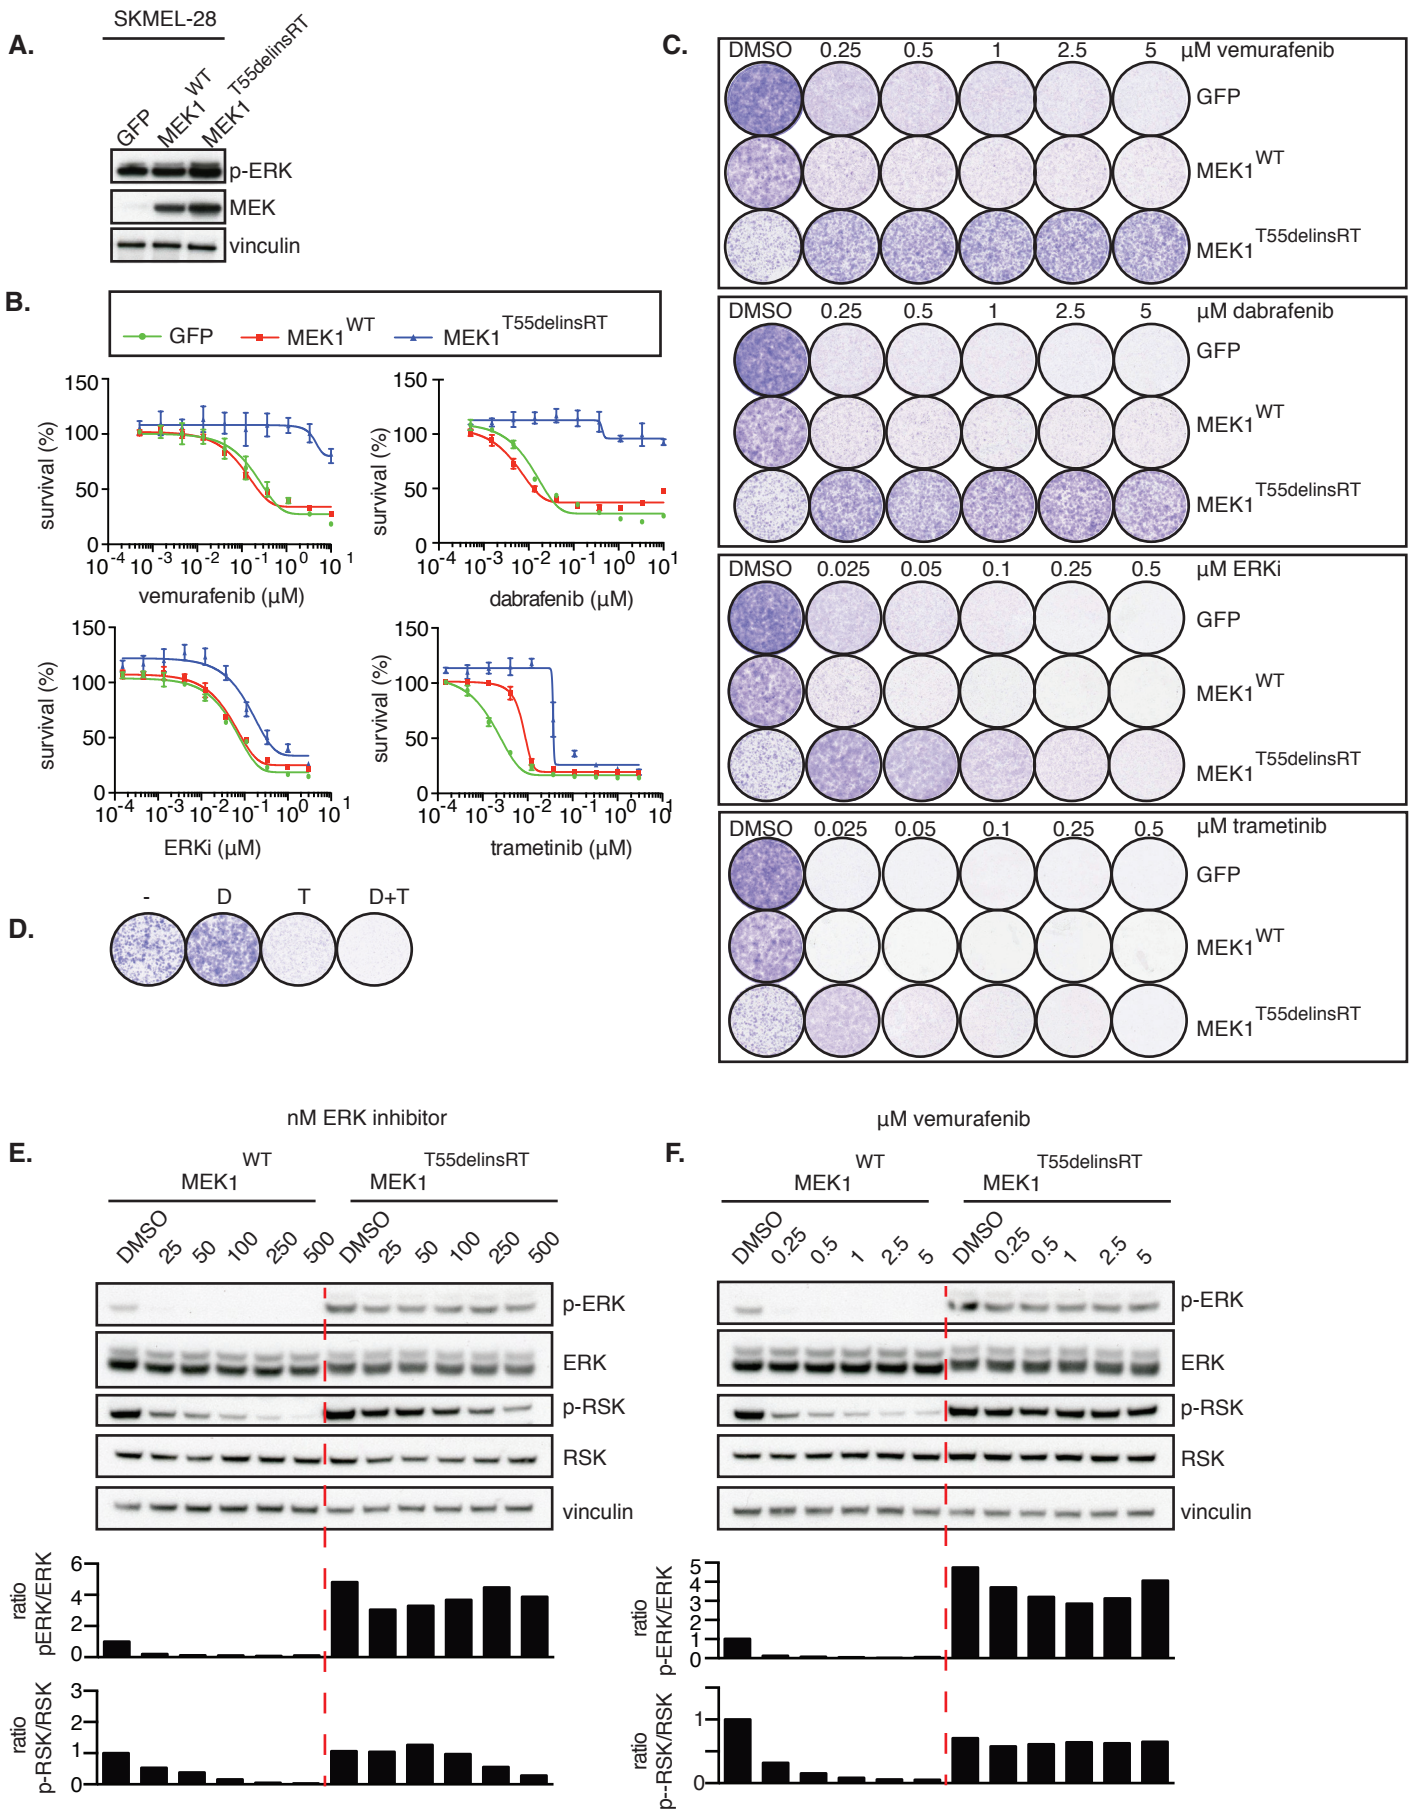

Figure S5

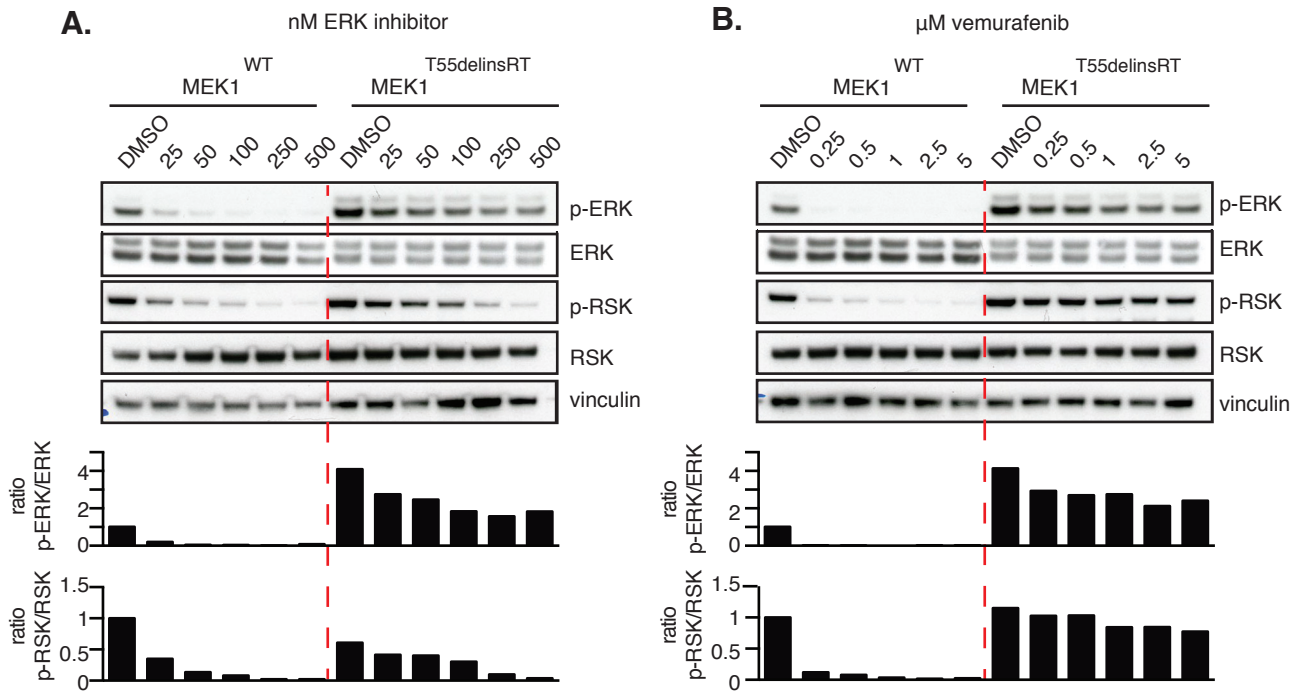



**Figure S6**

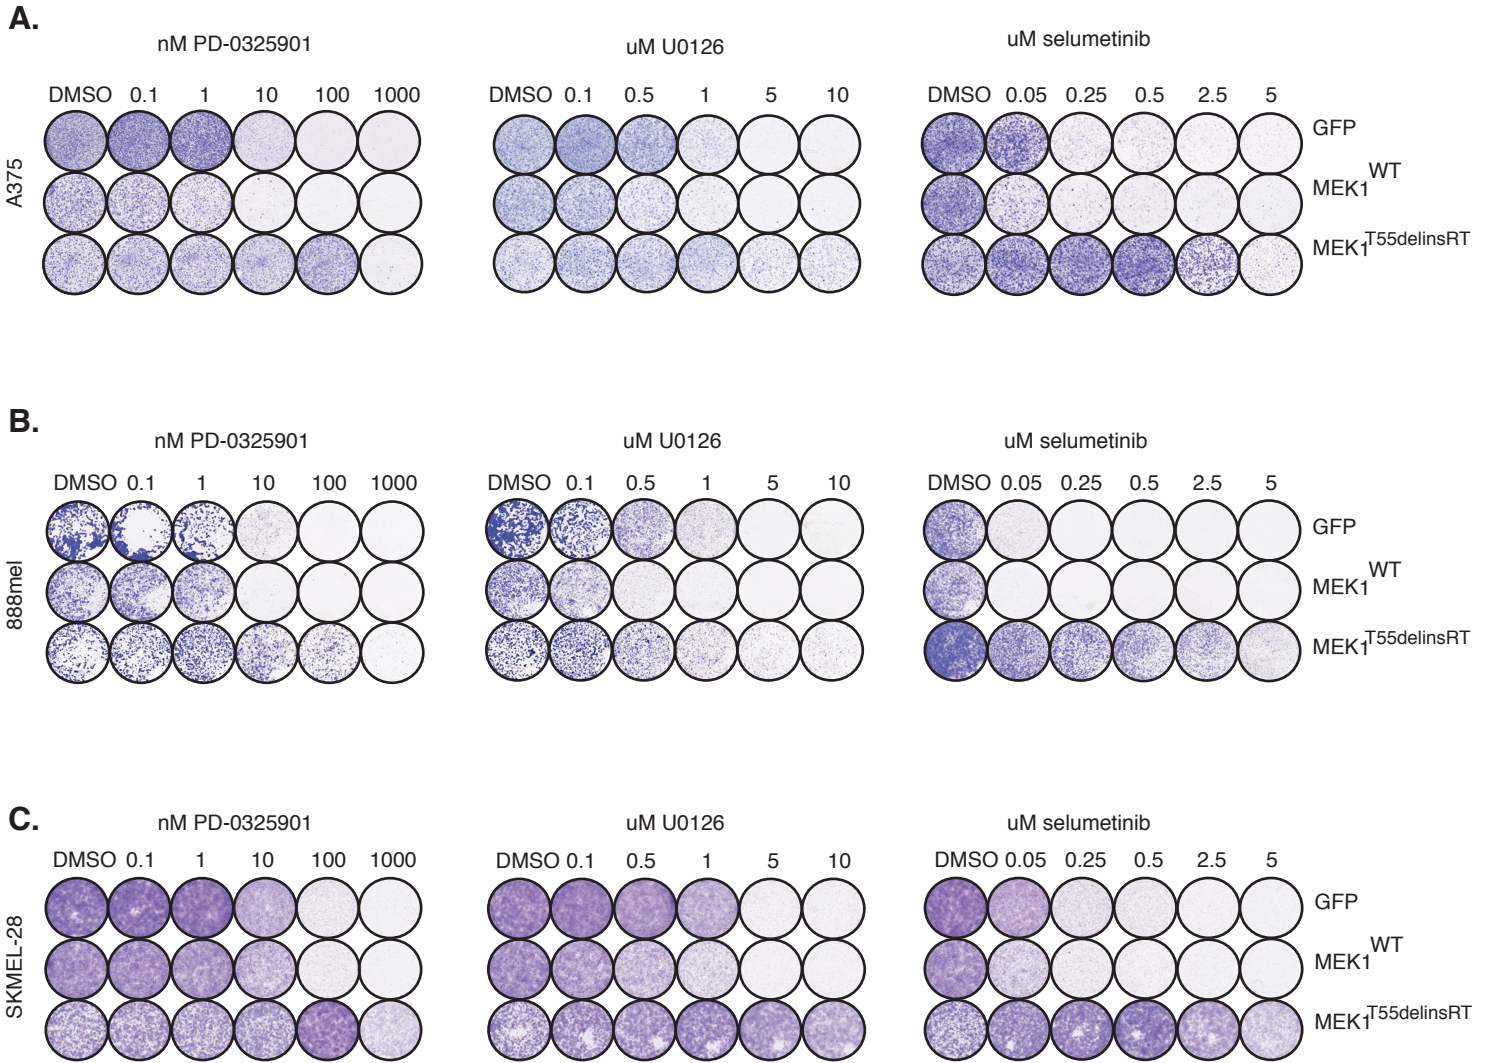

Figure S7

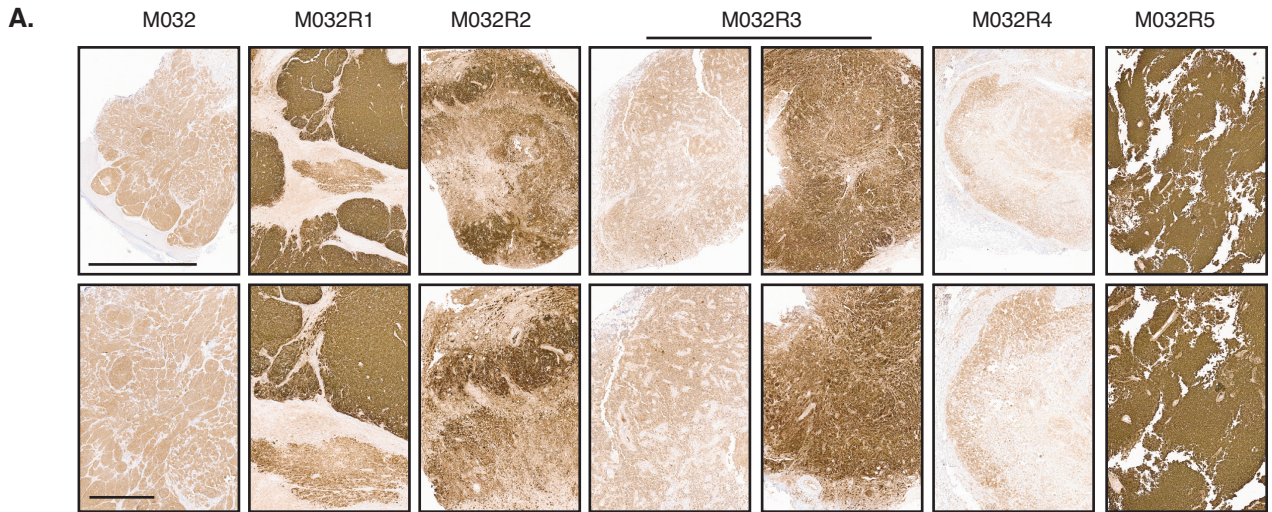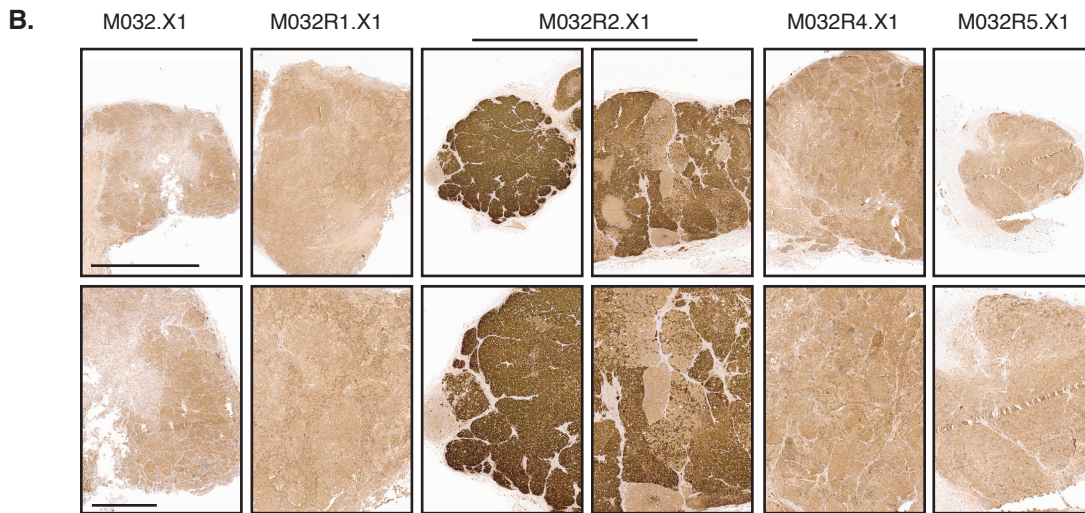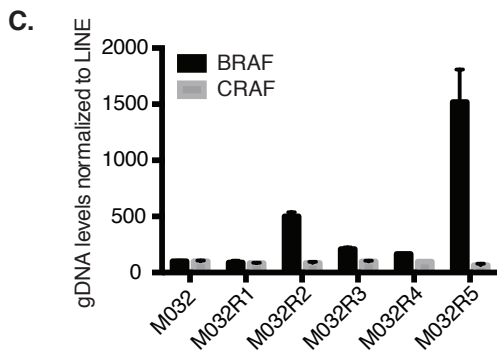

**Table S1:** Sequence coverage, median, 10x, 20x, 30x

| Sample | Median coverage | >10x  | >20x  | >30x  |
|--------|-----------------|-------|-------|-------|
| Blood  | 65x             | 0.872 | 0.777 | 0.698 |
| Pre    | 41x             | 0.810 | 0.681 | 0.582 |
| R1     | 46x             | 0.825 | 0.706 | 0.614 |
| R2     | 35x             | 0.794 | 0.652 | 0.543 |
| R3     | 43x             | 0.816 | 0.691 | 0.597 |
| R5     | 32x             | 0.764 | 0.617 | 0.508 |
| R6     | 46x             | 0.829 | 0.708 | 0.615 |



Table S2

| Func   | Gene                | ExonicFunc             | AAChange                                 | Chr | Start     | End       | Ref | Obs | Pre  | R1   | R2   | R3   | R4   | R5   |
|--------|---------------------|------------------------|------------------------------------------|-----|-----------|-----------|-----|-----|------|------|------|------|------|------|
| exonic | C1orf86             | stoploss SNV           | NM_001256946:c.A588G:p.X196W             | 1   | 2124297   | 2124297   | T   | C   | 0,00 | 0,00 | 0,12 | 0,17 | 0,08 | 0,00 |
| exonic | CHD5                | nonsynonymous SNV      | NM_015557:c.G3606T:p.K1202N              | 1   | 6188911   | 6188911   | C   | A   | 0,32 | 0,32 | 0,42 | 0,31 | 0,20 | 0,18 |
| exonic | KIF17               | nonsynonymous SNV      | NM_001122819:c.G2672A:p.G891D            | 1   | 20998481  | 20998481  | C   | T   | 0,26 | 0,39 | 0,53 | 0,19 | 0,13 | 0,21 |
| exonic | CSMD2               | nonsynonymous SNV      | NM_052896:c.G10129A:p.G3377S             | 1   | 33987099  | 33987099  | C   | T   | 0,21 | 0,39 | 0,43 | 0,37 | 0,21 | 0,22 |
| exonic | DLGAP3              | nonsynonymous SNV      | NM_001080418:c.A2287C:p.T763P            | 1   | 35334404  | 35334404  | T   | G   | 0,50 | 0,20 | 0,30 | 0,21 | 0,32 | 0,29 |
| exonic | RAD54L              | nonsynonymous SNV      | NM_003579:c.C1600A:p.R534S               | 1   | 46739409  | 46739409  | C   | A   | 0,36 | 0,00 | 0,00 | 0,00 | 0,00 | 0,00 |
| exonic | CC2D1B              | nonsynonymous SNV      | NM_032449:c.C1864A:p.Q622K               | 1   | 52822705  | 52822705  | G   | T   | 0,67 | 0,00 | 0,00 | 0,00 | 0,00 | 0,00 |
| exonic | DPYD                | nonsynonymous SNV      | NM_001160301:c.C514T:p.H172Y             | 1   | 98186452  | 98186452  | G   | A   | 0,32 | 0,41 | 0,50 | 0,27 | 0,25 | 0,23 |
| exonic | ADAM30              | nonsynonymous SNV      | NM_021794:c.G929A:p.G310E                | 1   | 120438031 | 120438031 | C   | T   | 0,33 | 0,40 | 0,36 | 0,22 | 0,07 | 0,14 |
| exonic | RPTN                | nonsynonymous SNV      | NM_001122965:c.A460G:p.R154G             | 1   | 152129115 | 152129115 | T   | C   | 0,10 | 0,08 | 0,11 | 0,06 | 0,16 | 0,15 |
| exonic | FLG                 | nonsynonymous SNV      | NM_002016:c.G11692A:p.G3898S             | 1   | 152275670 | 152275670 | C   | T   | 0,26 | 0,37 | 0,22 | 0,12 | 0,27 | 0,21 |
| exonic | ARHGGEF11           | nonsynonymous SNV      | NM_014784:c.G229T:p.A77S                 | 1   | 156950273 | 156950273 | C   | A   | 0,00 | 0,00 | 0,00 | 0,00 | 0,00 | 0,44 |
| exonic | SELP                | nonsynonymous SNV      | NM_003005:c.A1332T:p.Q444H               | 1   | 169578743 | 169578743 | T   | A   | 0,00 | 0,04 | 0,00 | 0,00 | 0,00 | 0,14 |
| exonic | PRG4                | nonsynonymous SNV      | NM_001127710:c.G1486A:p.E496K            | 1   | 186276739 | 186276739 | G   | A   | 0,00 | 0,04 | 0,02 | 0,00 | 0,14 | 0,00 |
| exonic | PTGS2               | stopgain SNV           | NM_000963:c.C721T:p.Q241X                | 1   | 186645967 | 186645967 | G   | A   | 0,30 | 0,28 | 0,28 | 0,15 | 0,15 | 0,19 |
| exonic | PIK3C2B             | nonsynonymous SNV      | NM_002646:c.G4729T:p.G1577W              | 1   | 204394156 | 204394156 | C   | A   | 0,00 | 0,04 | 0,00 | 0,00 | 0,36 | 0,00 |
| exonic | DNAH14              | nonsynonymous SNV      | NM_001373:c.C2776G:p.P926A               | 1   | 225268090 | 225268090 | C   | G   | 0,00 | 0,25 | 0,31 | 0,15 | 0,12 | 0,15 |
| exonic | FMN2                | nonframeshift deletion | NM_020066:c.658_660del:p.220_220del      | 1   | 240256067 | 240256069 | CAG | -   | 0,00 | 0,00 | 0,25 | 0,00 | 0,00 | 0,15 |
| exonic | OR2M3               | nonsynonymous SNV      | NM_001004689:c.G922A:p.G308S             | 1   | 248367291 | 248367291 | G   | A   | 0,20 | 0,22 | 0,20 | 0,14 | 0,11 | 0,17 |
| exonic | SH3YL1              | nonsynonymous SNV      | NM_001159597:c.A614G:p.E205G             | 2   | 231111    | 231111    | T   | C   | 0,27 | 0,35 | 0,26 | 0,14 | 0,07 | 0,11 |
| exonic | GAREML              | nonsynonymous SNV      | NM_001168241:c.C1838T:p.P613L            | 2   | 26410339  | 26410339  | C   | T   | 0,33 | 0,44 | 0,38 | 0,22 | 0,23 | 0,22 |
| exonic | TMEM247             | nonsynonymous SNV      | NM_001145051:c.A458G:p.Q153R             | 2   | 46707884  | 46707884  | A   | G   | 0,21 | 0,23 | 0,00 | 0,33 | 0,18 | 0,20 |
| exonic | STON1,STON1-GTF2A1L | nonsynonymous SNV      | NM_001198594:c.C164T:p.S55F              | 2   | 48807936  | 48807936  | C   | T   | 0,38 | 0,49 | 0,33 | 0,27 | 0,09 | 0,29 |
| exonic | NRXN1               | nonsynonymous SNV      | NM_004801:c.G833A:p.G278E                | 2   | 50850753  | 50850753  | C   | T   | 0,00 | 0,35 | 0,37 | 0,24 | 0,09 | 0,11 |
| exonic | NRXN1               | nonsynonymous SNV      | NM_004801:c.G832A:p.G278R                | 2   | 50850754  | 50850754  | C   | T   | 0,00 | 0,35 | 0,34 | 0,23 | 0,09 | 0,11 |
| exonic | STARD7              | stopgain SNV           | NM_020151:c.G262T:p.E88X                 | 2   | 96873911  | 96873911  | C   | A   | 0,11 | 0,47 | 0,55 | 0,21 | 0,26 | 0,27 |
| exonic | AFB3                | nonframeshift deletion | NM_001025108:c.1330_1332del:p.444_444del | 2   | 100218011 | 100218013 | GCT | -   | 0,00 | 0,22 | 0,10 | 0,18 | 0,10 | 0,18 |
| exonic | HS6ST1              | stopgain SNV           | NM_004807:c.A199T:p.K67X                 | 2   | 129075939 | 129075939 | T   | A   | 0,14 | 0,17 | 0,13 | 0,16 | 0,21 | 0,14 |
| exonic | LRP1B               | nonsynonymous SNV      | NM_018557:c.C9265T:p.P3089S              | 2   | 141243072 | 141243072 | G   | A   | 0,17 | 0,26 | 0,23 | 0,26 | 0,08 | 0,00 |
| exonic | KIF5C               | nonsynonymous SNV      | NM_004522:c.G2716A:p.E906K               | 2   | 149866814 | 149866814 | G   | A   | 0,02 | 0,45 | 0,40 | 0,12 | 0,08 | 0,25 |
| exonic | TTN                 | stopgain SNV           | NM_133379:c.C16321T:p.R5441X             | 2   | 179610806 | 179610806 | G   | A   | 0,18 | 0,30 | 0,38 | 0,27 | 0,09 | 0,18 |
| exonic | ITGAV               | frameshift deletion    | NM_001145000:c.1357delA:p.K453fs         | 2   | 187516776 | 187516776 | A   | -   | 0,06 | 0,24 | 0,21 | 0,08 | 0,11 | 0,17 |
| exonic | ITGAV               | nonsynonymous SNV      | NM_001145000:c.A1360G:p.T454A            | 2   | 187516779 | 187516779 | A   | G   | 0,04 | 0,23 | 0,19 | 0,07 | 0,09 | 0,16 |
| exonic | ANKAR               | nonsynonymous SNV      | NM_144708:c.C2947A:p.Q983K               | 2   | 190593062 | 190593062 | C   | A   | 0,26 | 0,28 | 0,36 | 0,17 | 0,15 | 0,26 |
| exonic | DNAH7               | nonsynonymous SNV      | NM_018897:c.G5109A:p.M1703I              | 2   | 196753643 | 196753643 | C   | T   | 0,24 | 0,29 | 0,27 | 0,16 | 0,12 | 0,18 |
| exonic | CPS1                | nonsynonymous SNV      | NM_001122634:c.C2435T:p.S812F            | 2   | 211525240 | 211525240 | C   | T   | 0,00 | 0,02 | 0,00 | 0,00 | 0,01 | 0,12 |
| exonic | TNS1                | nonsynonymous SNV      | NM_022648:c.G2321A:p.G774E               | 2   | 218712544 | 218712544 | C   | T   | 0,35 | 0,25 | 0,51 | 0,09 | 0,13 | 0,37 |
| exonic | DAW1                | nonsynonymous SNV      | NM_178821:c.G631A:p.E211K                | 2   | 228767808 | 228767808 | G   | A   | 0,22 | 0,36 | 0,28 | 0,27 | 0,13 | 0,22 |
| exonic | HTR2B               | nonsynonymous SNV      | NM_000867:c.G1408A:p.E470K               | 2   | 231973269 | 231973269 | C   | T   | 0,00 | 0,03 | 0,00 | 0,00 | 0,00 | 0,16 |
| exonic | RNPEPL1             | nonsynonymous SNV      | NM_018226:c.C1949T:p.A650V               | 2   | 241517080 | 241517080 | C   | T   | 0,29 | 0,00 | 0,00 | 0,00 | 0,00 | 0,00 |
| exonic | ENTPD3              | nonsynonymous SNV      | NM_001248:c.G980A:p.G327E                | 3   | 40464489  | 40464489  | G   | A   | 0,24 | 0,33 | 0,28 | 0,19 | 0,21 | 0,14 |
| exonic | TRAK1               | nonsynonymous SNV      | NM_001042646:c.G2287A:p.G763S            | 3   | 42264654  | 42264654  | G   | A   | 0,14 | 0,00 | 0,00 | 0,00 | 0,00 | 0,00 |
| exonic | ZNF445              | nonsynonymous SNV      | NM_181489:c.T1638G:p.C546W               | 3   | 44489525  | 44489525  | A   | C   | 0,26 | 0,34 | 0,20 | 0,15 | 0,08 | 0,25 |
| exonic | SETD2               | nonsynonymous SNV      | NM_014159:c.C374T:p.S125F                | 3   | 47165752  | 47165752  | G   | A   | 0,29 | 0,30 | 0,45 | 0,23 | 0,19 | 0,24 |
| exonic | MAP4                | nonsynonymous SNV      | NM_001134364:c.G530A:p.G177D             | 3   | 47960331  | 47960331  | C   | T   | 0,00 | 0,23 | 0,38 | 0,34 | 0,11 | 0,16 |
| exonic | PARP3               | nonsynonymous SNV      | NM_001003931:c.C1390T:p.P464S            | 3   | 51981848  | 51981848  | C   | T   | 0,20 | 0,26 | 0,15 | 0,14 | 0,10 | 0,15 |
| exonic | TLR9                | nonsynonymous SNV      | NM_017442:c.C2674T:p.R892W               | 3   | 52255658  | 52255658  | G   | A   | 0,25 | 0,36 | 0,24 | 0,22 | 0,35 | 0,18 |
| exonic | SPATA12             | nonsynonymous SNV      | NM_181727:c.A562G:p.T188A                | 3   | 57108284  | 57108284  | A   | G   | 0,21 | 0,35 | 0,07 | 0,14 | 0,12 | 0,19 |
| exonic | FLNB                | nonsynonymous SNV      | NM_001457:c.G5168A:p.G1723E              | 3   | 58127643  | 58127643  | G   | A   | 0,32 | 0,35 | 0,18 | 0,22 | 0,11 | 0,13 |
| exonic | EPHA6               | nonsynonymous SNV      | NM_001080448:c.A446G:p.N149S             | 3   | 96585729  | 96585729  | A   | G   | 0,38 | 0,29 | 0,29 | 0,08 | 0,14 | 0,21 |
| exonic | UROC1               | nonsynonymous SNV      | NM_001165974:c.G379A:p.G127R             | 3   | 126227291 | 126227291 | C   | T   | 0,00 | 0,31 | 0,00 | 0,00 | 0,00 | 0,00 |
| exonic | ASTE1               | frameshift insertion   | NM_014065:c.1895_1896insA:p.R632fs       | 3   | 130733046 | 130733046 | -   | T   | 0,17 | 0,02 | 0,10 | 0,08 | 0,10 | 0,00 |
| exonic | TRIM42              | nonsynonymous SNV      | NM_152616:c.C220T:p.P74S                 | 3   | 140397291 | 140397291 | C   | T   | 0,35 | 0,16 | 0,32 | 0,19 | 0,22 | 0,25 |
| exonic | PRKCI               | nonsynonymous SNV      | NM_002740:c.C1438T:p.R480C               | 3   | 170013719 | 170013719 | C   | T   | 0,29 | 0,30 | 0,27 | 0,21 | 0,13 | 0,21 |

|        |                      |                        |                                        |   |           |           |      |    |      |      |      |      |      |      |
|--------|----------------------|------------------------|----------------------------------------|---|-----------|-----------|------|----|------|------|------|------|------|------|
| exonic | ATP13A4              | nonsynonymous SNV      | NM_032279:c.C1088T;p.T363I             | 3 | 193185131 | 193185131 | G    | A  | 0,21 | 0,26 | 0,03 | 0,17 | 0,13 | 0,22 |
| exonic | MFSD7                | nonsynonymous SNV      | NM_032219:c.A1327C;p.T443P             | 4 | 676100    | 676100    | T    | G  | 0,20 | 0,11 | 0,17 | 0,08 | 0,29 | 0,25 |
| exonic | YIPF7                | nonsynonymous SNV      | NM_182592:c.C587T;p.S196L              | 4 | 44626711  | 44626711  | G    | A  | 0,21 | 0,37 | 0,48 | 0,25 | 0,33 | 0,26 |
| exonic | FRAS1                | nonsynonymous SNV      | NM_025074:c.C9619T;p.P3207S            | 4 | 79429999  | 79429999  | C    | T  | 0,27 | 0,32 | 0,33 | 0,20 | 0,22 | 0,28 |
| exonic | PCDH18               | nonsynonymous SNV      | NM_019035:c.C509T;p.S170F              | 4 | 138452734 | 138452734 | G    | A  | 0,28 | 0,36 | 0,23 | 0,13 | 0,15 | 0,14 |
| exonic | SEMA5A               | nonsynonymous SNV      | NM_003966:c.G2311A;p.D771N             | 5 | 9063206   | 9063206   | C    | T  | 0,30 | 0,53 | 0,67 | 0,31 | 0,33 | 0,27 |
| exonic | DNAH5                | nonsynonymous SNV      | NM_001369:c.C8537T;p.A2846V            | 5 | 13788935  | 13788935  | G    | A  | 0,18 | 0,04 | 0,00 | 0,00 | 0,00 | 0,10 |
| exonic | EPB41L4A             | nonsynonymous SNV      | NM_022140:c.G432T;p.Q144H              | 5 | 111601931 | 111601931 | C    | A  | 0,00 | 0,00 | 0,44 | 0,00 | 0,00 | 0,00 |
| exonic | AP3S1                | frameshift deletion    | NM_001284:c.121_124del;p.41_42del      | 5 | 115202418 | 115202421 | AAGA | -  | 0,03 | 0,11 | 0,17 | 0,02 | 0,05 | 0,08 |
| exonic | FNIP1                | nonsynonymous SNV      | NM_001008738:c.C2657T;p.P886L          | 5 | 131007396 | 131007396 | G    | A  | 0,11 | 0,00 | 0,00 | 0,00 | 0,00 | 0,00 |
| exonic | PCDHA3               | nonsynonymous SNV      | NM_018906:c.G931A;p.E311K              | 5 | 140181713 | 140181713 | G    | A  | 0,17 | 0,05 | 0,00 | 0,01 | 0,00 | 0,08 |
| exonic | PCDHB1               | nonsynonymous SNV      | NM_013340:c.C2326T;p.P776S             | 5 | 140433381 | 140433381 | C    | T  | 0,19 | 0,40 | 0,32 | 0,26 | 0,08 | 0,19 |
| exonic | PCDHGB5              | nonsynonymous SNV      | NM_018925:c.G2225A;p.G742E             | 5 | 140779919 | 140779919 | G    | A  | 0,20 | 0,03 | 0,00 | 0,00 | 0,00 | 0,06 |
| exonic | PCDHGA10             | frameshift deletion    | NM_032090:c.2467delA;p.K823fs          | 5 | 140795209 | 140795209 | A    | -  | 0,18 | 0,03 | 0,16 | 0,21 | 0,09 | 0,17 |
| exonic | KCTD16               | nonsynonymous SNV      | NM_020768:c.G311A;p.G104E              | 5 | 143586588 | 143586588 | G    | A  | 0,15 | 0,00 | 0,00 | 0,00 | 0,00 | 0,04 |
| exonic | KIF4B                | nonsynonymous SNV      | NM_001099293:c.G3511A;p.E1171K         | 5 | 154396930 | 154396930 | G    | A  | 0,18 | 0,43 | 0,46 | 0,42 | 0,18 | 0,39 |
| exonic | FAM196B              | nonsynonymous SNV      | NM_001129891:c.G1409T;p.C470F          | 5 | 169308384 | 169308384 | C    | A  | 0,00 | 0,00 | 0,00 | 0,00 | 0,00 | 0,27 |
| exonic | GCNT2                | nonsynonymous SNV      | NM_001491:c.C719T;p.S240F              | 6 | 10557375  | 10557375  | C    | T  | 0,27 | 0,26 | 0,39 | 0,18 | 0,21 | 0,14 |
| exonic | HIST1H4L             | nonsynonymous SNV      | NM_003546:c.G8A;p.G3E                  | 6 | 27841281  | 27841281  | C    | T  | 0,17 | 0,31 | 0,29 | 0,24 | 0,14 | 0,25 |
| exonic | HLA-DQA1             | nonsynonymous SNV      | NM_002122:c.T231A;p.F77L               | 6 | 32609235  | 32609235  | T    | A  | 0,14 | 0,03 | 0,00 | 0,00 | 0,00 | 0,23 |
| exonic | HLA-DQA1             | nonsynonymous SNV      | NM_002122:c.G233A;p.G78E               | 6 | 32609237  | 32609237  | G    | A  | 0,14 | 0,03 | 0,00 | 0,00 | 0,00 | 0,23 |
| exonic | ITPR3                | nonsynonymous SNV      | NM_002224:c.G1273A;p.D425N             | 6 | 33632854  | 33632854  | G    | A  | 0,30 | 0,41 | 0,28 | 0,26 | 0,12 | 0,27 |
| exonic | CNPY3                | nonframeshift deletion | NM_006586:c.50_52del;p.17_18del        | 6 | 42897358  | 42897360  | TGC  | -  | 0,38 | 0,00 | 0,00 | 0,11 | 0,07 | 0,25 |
| exonic | CY5R4                | nonsynonymous SNV      | NM_016230:c.C334T;p.H112Y              | 6 | 84618731  | 84618731  | C    | T  | 0,33 | 0,77 | 0,50 | 0,12 | 0,18 | 0,32 |
| exonic | ROS1                 | stopgain SNV           | NM_002944:c.G63A;p.W21X                | 6 | 117746757 | 117746757 | C    | T  | 0,60 | 0,56 | 0,52 | 0,18 | 0,18 | 0,28 |
| exonic | SERINC1              | nonsynonymous SNV      | NM_020755:c.G783T;p.L261F              | 6 | 122772876 | 122772876 | C    | A  | 0,16 | 0,29 | 0,06 | 0,11 | 0,19 | 0,13 |
| exonic | ARID1B               | stopgain SNV           | NM_017519:c.C2383T;p.Q795X             | 6 | 157454212 | 157454212 | C    | T  | 0,26 | 0,29 | 0,35 | 0,17 | 0,08 | 0,27 |
| exonic | UNC93A               | nonsynonymous SNV      | NM_001143947:c.G356A;p.G119E           | 6 | 167709606 | 167709606 | G    | A  | 0,01 | 0,27 | 0,42 | 0,15 | 0,17 | 0,17 |
| exonic | THBS2                | nonsynonymous SNV      | NM_003247:c.T2734G;p.C912G             | 6 | 169625279 | 169625279 | A    | C  | 0,17 | 0,37 | 0,51 | 0,23 | 0,14 | 0,19 |
| exonic | STK31                | nonsynonymous SNV      | NM_001260504:c.C892T;p.L298F           | 7 | 23776641  | 23776641  | C    | T  | 0,39 | 0,60 | 0,45 | 0,27 | 0,27 | 0,45 |
| exonic | INMT                 | nonsynonymous SNV      | NM_001199219:c.A743G;p.N248S           | 7 | 30795421  | 30795421  | A    | G  | 0,35 | 0,43 | 0,46 | 0,21 | 0,33 | 0,33 |
| exonic | NPSR1                | nonsynonymous SNV      | NM_207172:c.G1027A;p.E343K             | 7 | 34889178  | 34889178  | G    | A  | 0,20 | 0,24 | 0,35 | 0,19 | 0,09 | 0,17 |
| exonic | AOAH                 | nonsynonymous SNV      | NM_001177507:c.C1120T;p.H374Y          | 7 | 36580015  | 36580015  | G    | A  | 0,30 | 0,41 | 0,50 | 0,08 | 0,11 | 0,25 |
| exonic | PPIA                 | nonsynonymous SNV      | NM_021130:c.G241A;p.E81K               | 7 | 44839352  | 44839352  | G    | A  | 0,43 | 0,54 | 0,51 | 0,32 | 0,36 | 0,27 |
| exonic | ADCY1                | nonsynonymous SNV      | NM_021116:c.G2716A;p.E906K             | 7 | 45743343  | 45743343  | G    | A  | 0,19 | 0,25 | 0,30 | 0,16 | 0,16 | 0,18 |
| exonic | PKD1L1               | nonsynonymous SNV      | NM_138295:c.C3143T;p.S1048F            | 7 | 47925346  | 47925346  | G    | A  | 0,00 | 0,17 | 0,32 | 0,23 | 0,23 | 0,16 |
| exonic | LANCL2               | nonsynonymous SNV      | NM_018697:c.G655A;p.V219M              | 7 | 55467774  | 55467774  | G    | A  | 0,19 | 0,31 | 0,33 | 0,14 | 0,13 | 0,16 |
| exonic | ZNF107               | frameshift insertion   | NM_001013746:c.2337_2338insAA;p.E779fs | 7 | 64169019  | 64169019  | -    | AA | 0,00 | 0,02 | 0,20 | 0,00 | 0,08 | 0,12 |
| exonic | GTF2IRD1             | nonsynonymous SNV      | NM_001199207:c.C1504T;p.R502W          | 7 | 73950604  | 73950604  | C    | T  | 0,05 | 0,21 | 0,18 | 0,17 | 0,08 | 0,14 |
| exonic | AKAP9                | nonsynonymous SNV      | NM_005751:c.C1110A;p.N370K             | 7 | 91630341  | 91630341  | C    | A  | 0,00 | 0,00 | 0,21 | 0,06 | 0,18 | 0,10 |
| exonic | ASZ1                 | nonsynonymous SNV      | NM_130768:c.G413A;p.R138K              | 7 | 117060244 | 117060244 | C    | T  | 0,17 | 0,30 | 0,22 | 0,06 | 0,17 | 0,13 |
| exonic | RBM28                | nonsynonymous SNV      | NM_001166135:c.G256A;p.D86N            | 7 | 127976031 | 127976031 | C    | T  | 0,02 | 0,00 | 0,13 | 0,00 | 0,02 | 0,05 |
| exonic | CREB3L2              | stopgain SNV           | NM_194071:c.C1257G;p.Y419X             | 7 | 137569754 | 137569754 | G    | C  | 0,00 | 0,00 | 0,13 | 0,00 | 0,01 | 0,00 |
| exonic | MKRN1                | nonsynonymous SNV      | NM_001145125:c.C122G;p.A41G            | 7 | 140179023 | 140179023 | G    | C  | 0,00 | 0,00 | 0,28 | 0,25 | 0,00 | 0,00 |
| exonic | MKRN1                | nonsynonymous SNV      | NM_001145125:c.A85C;p.T29P             | 7 | 140179060 | 140179060 | T    | G  | 0,50 | 0,11 | 0,18 | 0,50 | 0,00 | 0,00 |
| exonic | BRAF                 | nonsynonymous SNV      | NM_004333:c.T1799A;p.V600E             | 7 | 140453136 | 140453136 | A    | T  | 0,53 | 0,90 | 0,94 | 0,32 | 0,38 | 0,82 |
| exonic | KEL                  | nonsynonymous SNV      | NM_000420:c.G1285A;p.E429K             | 7 | 142643323 | 142643323 | C    | T  | 0,43 | 0,56 | 0,42 | 0,25 | 0,18 | 0,32 |
| exonic | GIMAP1,GIMAP1-GIMAP5 | nonsynonymous SNV      | NM_001199577:c.G122A;p.S41N            | 7 | 150417214 | 150417214 | G    | A  | 0,40 | 0,58 | 0,52 | 0,28 | 0,37 | 0,48 |
| exonic | PAXIP1               | nonsynonymous SNV      | NM_007349:c.A74C;p.D25A                | 7 | 154794566 | 154794566 | T    | G  | 0,07 | 0,24 | 0,25 | 0,38 | 0,20 | 0,47 |
| exonic | DEFA4                | nonsynonymous SNV      | NM_001925:c.C134T;p.S45F               | 8 | 6794288   | 6794288   | G    | A  | 0,17 | 0,21 | 0,32 | 0,17 | 0,21 | 0,10 |
| exonic | SGK223               | frameshift deletion    | NM_001080826:c.3501delT;p.A1167fs      | 8 | 8176384   | 8176384   | A    | -  | 0,39 | 0,27 | 0,33 | 0,09 | 0,14 | 0,44 |
| exonic | ADAM28               | nonsynonymous SNV      | NM_014265:c.G841A;p.G281R              | 8 | 24181467  | 24181467  | G    | A  | 0,23 | 0,30 | 0,21 | 0,16 | 0,04 | 0,12 |
| exonic | ADAM18               | nonsynonymous SNV      | NM_001190956:c.C304T;p.P102S           | 8 | 39467040  | 39467040  | C    | T  | 0,19 | 0,32 | 0,25 | 0,22 | 0,19 | 0,14 |
| exonic | ANK1                 | nonsynonymous SNV      | NM_000037:c.G4558A;p.E1520K            | 8 | 41530410  | 41530410  | C    | T  | 0,10 | 0,17 | 0,50 | 0,17 | 0,40 | 0,50 |
| exonic | FAM110B              | nonsynonymous SNV      | NM_147189:c.C442T;p.R148W              | 8 | 59059231  | 59059231  | C    | T  | 0,11 | 0,25 | 0,17 | 0,15 | 0,20 | 0,35 |

|        |          |                        |                                          |    |           |           |     |   |      |      |      |      |      |      |
|--------|----------|------------------------|------------------------------------------|----|-----------|-----------|-----|---|------|------|------|------|------|------|
| exonic | PREX2    | nonsynonymous SNV      | NM_024870:c.C349T:p.R117C                | 8  | 68934283  | 68934283  | C   | T | 0,28 | 0,34 | 0,44 | 0,18 | 0,26 | 0,05 |
| exonic | SBSPPON  | nonsynonymous SNV      | NM_153225:c.C566A:p.T189N                | 8  | 73982151  | 73982151  | G   | T | 0,30 | 0,33 | 0,49 | 0,12 | 0,13 | 0,16 |
| exonic | IL7      | nonsynonymous SNV      | NM_000880:c.C71T:p.S24L                  | 8  | 79710383  | 79710383  | G   | A | 0,26 | 0,35 | 0,21 | 0,27 | 0,10 | 0,34 |
| exonic | CNGB3    | nonsynonymous SNV      | NM_019098:c.C2179G:p.Q727E               | 8  | 87588283  | 87588283  | G   | C | 0,00 | 0,03 | 0,09 | 0,05 | 0,14 | 0,03 |
| exonic | CNGB3    | nonsynonymous SNV      | NM_019098:c.C2158G:p.Q720E               | 8  | 87588304  | 87588304  | G   | C | 0,00 | 0,00 | 0,15 | 0,02 | 0,05 | 0,07 |
| exonic | VPS13B   | nonsynonymous SNV      | NM_017890:c.C6577T:p.L2193F              | 8  | 100729446 | 100729446 | C   | T | 0,00 | 0,21 | 0,57 | 0,20 | 0,15 | 0,05 |
| exonic | KCNQ3    | nonsynonymous SNV      | NM_004519:c.G250A:p.G84S                 | 8  | 133492530 | 133492530 | C   | T | 0,25 | 0,67 | 0,67 | 0,36 | 0,17 | 0,08 |
| exonic | GPR20    | frameshift insertion   | NM_005293:c.476_477insC:p.R159fs         | 8  | 142367548 | 142367548 | -   | G | 0,11 | 0,00 | 0,19 | 0,20 | 0,38 | 0,00 |
| exonic | MAPK15   | nonsynonymous SNV      | NM_139021:c.C1196T:p.A399V               | 8  | 144803573 | 144803573 | C   | T | 0,27 | 0,26 | 0,42 | 0,19 | 0,13 | 0,04 |
| exonic | MPDZ     | nonsynonymous SNV      | NM_001261406:c.C2405T:p.S802F            | 9  | 13186345  | 13186345  | G   | A | 0,28 | 0,53 | 0,69 | 0,20 | 0,09 | 0,29 |
| exonic | DNAI1    | nonsynonymous SNV      | NM_012144:c.C646T:p.P216S                | 9  | 34491517  | 34491517  | C   | T | 0,27 | 0,37 | 0,28 | 0,13 | 0,30 | 0,24 |
| exonic | CCL27    | nonsynonymous SNV      | NM_006664:c.G89T:p.S30I                  | 9  | 34662395  | 34662395  | C   | A | 0,00 | 0,19 | 0,00 | 0,00 | 0,00 | 0,00 |
| exonic | VCP      | frameshift insertion   | NM_007126:c.1848_1849insA:p.N616fs       | 9  | 35059646  | 35059646  | -   | T | 0,07 | 0,01 | 0,03 | 0,05 | 0,16 | 0,06 |
| exonic | HRCT1    | nonframeshift deletion | NM_001039792:c.64_66del:p.22_22del       | 9  | 35906348  | 35906350  | CTG | - | 0,00 | 0,00 | 0,16 | 0,14 | 0,09 | 0,00 |
| exonic | C9orf135 | nonsynonymous SNV      | NM_001010940:c.G250A:p.D84N              | 9  | 72459530  | 72459530  | G   | A | 0,23 | 0,37 | 0,27 | 0,14 | 0,17 | 0,25 |
| exonic | SVEP1    | stopgain SNV           | NM_153366:c.G6395A:p.W2132X              | 9  | 113173596 | 113173596 | C   | T | 0,30 | 0,44 | 0,54 | 0,28 | 0,19 | 0,32 |
| exonic | PTBP3    | nonsynonymous SNV      | NM_001244897:c.T1481C:p.L494P            | 9  | 114982615 | 114982615 | A   | G | 0,00 | 0,00 | 0,18 | 0,00 | 0,00 | 0,03 |
| exonic | TTF1     | nonsynonymous SNV      | NM_007344:c.A697G:p.T233A                | 9  | 135277512 | 135277512 | T   | C | 0,00 | 0,00 | 0,08 | 0,02 | 0,04 | 0,16 |
| exonic | TTF1     | nonsynonymous SNV      | NM_007344:c.A692T:p.Y231F                | 9  | 135277517 | 135277517 | T   | A | 0,00 | 0,00 | 0,12 | 0,02 | 0,04 | 0,16 |
| exonic | TTF1     | nonsynonymous SNV      | NM_007344:c.G686A:p.R229Q                | 9  | 135277523 | 135277523 | C   | T | 0,00 | 0,00 | 0,17 | 0,02 | 0,06 | 0,15 |
| exonic | TTF1     | nonsynonymous SNV      | NM_007344:c.A682C:p.N228H                | 9  | 135277527 | 135277527 | T   | G | 0,00 | 0,00 | 0,11 | 0,06 | 0,07 | 0,10 |
| exonic | TTF1     | nonsynonymous SNV      | NM_007344:c.G680A:p.S227N                | 9  | 135277529 | 135277529 | C   | T | 0,00 | 0,00 | 0,13 | 0,05 | 0,09 | 0,13 |
| exonic | GTF3C5   | stopgain SNV           | NM_001122823:c.C87A:p.Y29X               | 9  | 135906485 | 135906485 | C   | A | 0,14 | 0,00 | 0,00 | 0,00 | 0,00 | 0,18 |
| exonic | FAM171A1 | nonsynonymous SNV      | NM_001010924:c.G181A:p.A61T              | 10 | 15326021  | 15326021  | C   | T | 0,20 | 0,39 | 0,40 | 0,24 | 0,26 | 0,34 |
| exonic | KIAA1462 | nonsynonymous SNV      | NM_020848:c.C2053T:p.R685W               | 10 | 30317024  | 30317024  | G   | A | 0,00 | 0,41 | 0,03 | 0,00 | 0,00 | 0,01 |
| exonic | RBP3     | nonsynonymous SNV      | NM_002900:c.G2326A:p.A776T               | 10 | 48388552  | 48388552  | C   | T | 0,33 | 0,42 | 0,29 | 0,39 | 0,08 | 0,38 |
| exonic | ANK3     | nonsynonymous SNV      | NM_020987:c.C11915T:p.T3972I             | 10 | 61828724  | 61828724  | G   | A | 0,36 | 0,52 | 0,52 | 0,15 | 0,31 | 0,26 |
| exonic | GRID1    | nonsynonymous SNV      | NM_017551:c.A2848G:p.N950D               | 10 | 87362212  | 87362212  | T   | C | 0,33 | 0,46 | 0,69 | 0,20 | 0,21 | 0,25 |
| exonic | C10orf32 | nonsynonymous SNV      | NM_001136200:c.A53G:p.K18R               | 10 | 104614096 | 104614096 | A   | G | 0,40 | 0,00 | 0,00 | 0,00 | 0,00 | 0,00 |
| exonic | INA      | nonsynonymous SNV      | NM_032727:c.G826A:p.A276T                | 10 | 105037794 | 105037794 | G   | A | 0,00 | 0,50 | 0,00 | 0,00 | 0,00 | 0,00 |
| exonic | CALHM1   | stopgain SNV           | NM_001001412:c.G853T:p.E285X             | 10 | 105215207 | 105215207 | C   | A | 0,00 | 0,00 | 0,14 | 0,00 | 0,00 | 0,33 |
| exonic | SORCS3   | nonsynonymous SNV      | NM_014978:c.T3438A:p.F1146L              | 10 | 107016677 | 107016677 | T   | A | 0,33 | 0,42 | 0,58 | 0,26 | 0,28 | 0,24 |
| exonic | CASP7    | nonsynonymous SNV      | NM_001267058:c.C791T:p.P264L             | 10 | 115489253 | 115489253 | C   | T | 0,44 | 0,48 | 0,52 | 0,23 | 0,14 | 0,21 |
| exonic | FUOM     | nonsynonymous SNV      | NM_001098483:c.G266T:p.G89V              | 10 | 135170202 | 135170202 | C   | A | 0,00 | 0,00 | 0,00 | 0,36 | 0,00 | 0,07 |
| exonic | CD151    | nonsynonymous SNV      | NM_001039490:c.C674A:p.A225D             | 11 | 838000    | 838000    | C   | A | 0,00 | 0,44 | 0,00 | 0,00 | 0,00 | 0,00 |
| exonic | STIM1    | stopgain SNV           | NM_001277961:c.G451T:p.E151X             | 11 | 4076821   | 4076821   | G   | T | 0,00 | 0,14 | 0,22 | 0,00 | 0,00 | 0,00 |
| exonic | OR51S1   | nonsynonymous SNV      | NM_001004758:c.C497T:p.P166L             | 11 | 4869942   | 4869942   | G   | A | 0,29 | 0,47 | 0,47 | 0,15 | 0,14 | 0,33 |
| exonic | OR8J3    | nonsynonymous SNV      | NM_001004064:c.C8T:p.P3L                 | 11 | 55905187  | 55905187  | G   | A | 0,18 | 0,60 | 0,22 | 0,17 | 0,28 | 0,16 |
| exonic | OR5M9    | nonsynonymous SNV      | NM_001004743:c.G858A:p.M286I             | 11 | 56230020  | 56230020  | C   | T | 0,28 | 0,04 | 0,21 | 0,00 | 0,00 | 0,13 |
| exonic | KDM2A    | nonframeshift deletion | NM_001256405:c.1261_1263del:p.421_421del | 11 | 67018079  | 67018081  | GAG | - | 0,00 | 0,06 | 0,06 | 0,00 | 0,17 | 0,00 |
| exonic | PDE2A    | nonsynonymous SNV      | NM_001143839:c.G2523A:p.M841I            | 11 | 72289348  | 72289348  | C   | T | 0,32 | 0,13 | 0,20 | 0,00 | 0,00 | 0,02 |
| exonic | FAT3     | nonsynonymous SNV      | NM_001008781:c.C1012T:p.P338S            | 11 | 92086290  | 92086290  | C   | T | 0,23 | 0,09 | 0,20 | 0,00 | 0,00 | 0,11 |
| exonic | MLL      | nonsynonymous SNV      | NM_001197104:c.A1571T:p.N524I            | 11 | 118343445 | 118343445 | A   | T | 0,28 | 0,58 | 0,38 | 0,22 | 0,16 | 0,20 |
| exonic | C12orf4  | nonsynonymous SNV      | NM_020374:c.T1297C:p.C433R               | 12 | 4609447   | 4609447   | A   | G | 0,00 | 0,00 | 0,15 | 0,00 | 0,00 | 0,00 |
| exonic | ATN1     | nonsynonymous SNV      | NM_001007026:c.T1509G:p.H503Q            | 12 | 7045939   | 7045939   | T   | G | 0,05 | 0,05 | 0,05 | 0,03 | 0,12 | 0,07 |
| exonic | C1S      | nonsynonymous SNV      | NM_001734:c.C1348T:p.P450S               | 12 | 7177236   | 7177236   | C   | T | 0,25 | 0,57 | 0,42 | 0,25 | 0,22 | 0,28 |
| exonic | PRB3     | nonsynonymous SNV      | NM_006249:c.G695A:p.G232E                | 12 | 11420488  | 11420488  | C   | T | 0,10 | 0,00 | 0,14 | 0,00 | 0,00 | 0,00 |
| exonic | SLCO1B7  | stopgain SNV           | NM_001009562:c.A313T:p.R105X             | 12 | 21174489  | 21174489  | A   | T | 0,20 | 0,05 | 0,08 | 0,10 | 0,00 | 0,05 |
| exonic | ABCC9    | nonsynonymous SNV      | NM_005691:c.G2114A:p.G705D               | 12 | 22025643  | 22025643  | C   | T | 0,08 | 0,04 | 0,13 | 0,06 | 0,00 | 0,10 |
| exonic | IPO8     | nonsynonymous SNV      | NM_001190995:c.C1624T:p.L542F            | 12 | 30802100  | 30802100  | G   | A | 0,16 | 0,06 | 0,26 | 0,15 | 0,02 | 0,19 |
| exonic | ACVR1B   | nonsynonymous SNV      | NM_004302:c.T70G:p.S24A                  | 12 | 52345597  | 52345597  | T   | G | 0,33 | 0,40 | 0,27 | 0,38 | 0,50 | 0,27 |
| exonic | KRT74    | nonsynonymous SNV      | NM_175053:c.G1147A:p.E383K               | 12 | 52962161  | 52962161  | C   | T | 0,00 | 0,14 | 0,27 | 0,12 | 0,07 | 0,17 |
| exonic | KRT4     | nonsynonymous SNV      | NM_002272:c.G1418T:p.S473I               | 12 | 53200998  | 53200998  | C   | A | 0,00 | 0,00 | 0,00 | 0,00 | 0,20 | 0,00 |
| exonic | ESPL1    | nonsynonymous SNV      | NM_012291:c.C5461A:p.R1821S              | 12 | 53684721  | 53684721  | C   | A | 0,44 | 0,00 | 0,00 | 0,00 | 0,00 | 0,00 |
| exonic | ITGA7    | nonsynonymous SNV      | NM_001144996:c.G2405A:p.R802Q            | 12 | 56088079  | 56088079  | C   | T | 0,41 | 0,65 | 0,55 | 0,30 | 0,31 | 0,40 |

|        |                     |                         |                                         |    |           |           |   |     |      |      |      |      |      |      |
|--------|---------------------|-------------------------|-----------------------------------------|----|-----------|-----------|---|-----|------|------|------|------|------|------|
| exonic | GNS                 | nonsynonymous SNV       | NM_002076:c.G1205A:p.G402D              | 12 | 65116889  | 65116889  | C | T   | 0,28 | 0,68 | 0,63 | 0,38 | 0,31 | 0,50 |
| exonic | TBC1D15             | nonsynonymous SNV       | NM_001146213:c.C625T:p.L209F            | 12 | 72287072  | 72287072  | C | T   | 0,14 | 0,19 | 0,33 | 0,32 | 0,00 | 0,25 |
| exonic | TBC1D15             | nonsynonymous SNV       | NM_001146213:c.C749G:p.S250C            | 12 | 72288557  | 72288557  | C | G   | 0,12 | 0,05 | 0,05 | 0,08 | 0,00 | 0,00 |
| exonic | TBC1D15             | stopgain SNV            | NM_001146213:c.C757T:p.Q253X            | 12 | 72288565  | 72288565  | C | T   | 0,10 | 0,07 | 0,07 | 0,12 | 0,00 | 0,00 |
| exonic | TBC1D15             | nonsynonymous SNV       | NM_001146213:c.C802A:p.P268T            | 12 | 72288610  | 72288610  | C | A   | 0,15 | 0,05 | 0,09 | 0,10 | 0,00 | 0,08 |
| exonic | TMEM116             | nonsynonymous SNV       | NM_001193453:c.C73T:p.P255              | 12 | 112441609 | 112441609 | G | A   | 0,51 | 0,65 | 0,63 | 0,35 | 0,24 | 0,29 |
| exonic | NOS1                | nonsynonymous SNV       | NM_001204213:c.G2823A:p.M941I           | 12 | 117660664 | 117660664 | C | T   | 0,48 | 0,68 | 0,37 | 0,18 | 0,36 | 0,27 |
| exonic | GJA3                | nonsynonymous SNV       | NM_021954:c.G413A:p.R138K               | 13 | 20717015  | 20717015  | C | T   | 0,27 | 0,47 | 0,48 | 0,15 | 0,29 | 0,50 |
| exonic | FAM194B             | nonsynonymous SNV       | NM_182542:c.G324T:p.E108D               | 13 | 46170817  | 46170817  | C | A   | 0,01 | 0,02 | 0,14 | 0,08 | 0,14 | 0,06 |
| exonic | FAM194B             | nonsynonymous SNV       | NM_182542:c.C302A:p.A101E               | 13 | 46170839  | 46170839  | G | T   | 0,00 | 0,02 | 0,15 | 0,08 | 0,17 | 0,09 |
| exonic | OR4K1               | nonsynonymous SNV       | NM_001004063:c.A848G:p.N283S            | 14 | 20404673  | 20404673  | A | G   | 0,08 | 0,12 | 0,16 | 0,09 | 0,06 | 0,07 |
| exonic | ZFHX2               | nonsynonymous SNV       | NM_033400:c.G7138A:p.G2380R             | 14 | 23991752  | 23991752  | C | T   | 0,26 | 0,33 | 0,47 | 0,12 | 0,15 | 0,22 |
| exonic | NFATC4              | nonsynonymous SNV       | NM_001198965:c.C2123T:p.P708L           | 14 | 24845566  | 24845566  | C | T   | 0,33 | 0,27 | 0,36 | 0,17 | 0,25 | 0,24 |
| exonic | APA4S1              | nonsynonymous SNV       | NM_001254727:c.A370G:p.R124G            | 14 | 31552735  | 31552735  | A | G   | 0,00 | 0,00 | 0,23 | 0,07 | 0,08 | 0,03 |
| exonic | GPR137C             | nonsynonymous SNV       | NM_001099652:c.C344T:p.P115L            | 14 | 53020209  | 53020209  | C | T   | 0,32 | 0,24 | 0,43 | 0,23 | 0,24 | 0,27 |
| exonic | PLEKHD1             | nonsynonymous SNV       | NM_001161498:c.C833T:p.P278L            | 14 | 69992749  | 69992749  | C | T   | 0,00 | 0,22 | 0,30 | 0,26 | 0,23 | 0,19 |
| exonic | PPP4R4              | nonsynonymous SNV       | NM_058237:c.G784A:p.D262N               | 14 | 94703954  | 94703954  | G | A   | 0,26 | 0,29 | 0,29 | 0,22 | 0,21 | 0,17 |
| exonic | FMN1                | nonsynonymous SNV       | NM_001103184:c.T2120C:p.L707P           | 15 | 33261113  | 33261113  | A | G   | 0,40 | 0,06 | 0,00 | 0,20 | 0,14 | 0,09 |
| exonic | AQR                 | nonsynonymous SNV       | NM_014691:c.C3242T:p.P1081L             | 15 | 35167061  | 35167061  | G | A   | 0,22 | 0,30 | 0,24 | 0,13 | 0,10 | 0,17 |
| exonic | JMJD7,JMJD7-PLA2G4B | nonsynonymous SNV       | NM_001114632:c.C208T:p.P70S             | 15 | 42127081  | 42127081  | C | T   | 0,20 | 0,27 | 0,21 | 0,13 | 0,21 | 0,26 |
| exonic | CASC4               | nonsynonymous SNV       | NM_138423:c.C350T:p.S117L               | 15 | 44615185  | 44615185  | C | T   | 0,27 | 0,42 | 0,19 | 0,11 | 0,15 | 0,18 |
| exonic | B2M                 | nonsynonymous SNV       | NM_004048:c.A1G:p.M1V                   | 15 | 45003745  | 45003745  | A | G   | 0,00 | 0,35 | 0,40 | 0,23 | 0,00 | 0,17 |
| exonic | HERC1               | nonsynonymous SNV       | NM_003922:c.C668T:p.S223L               | 15 | 64067155  | 64067155  | G | A   | 0,21 | 0,27 | 0,42 | 0,14 | 0,01 | 0,18 |
| exonic | IGDCC4              | nonsynonymous SNV       | NM_020962:c.C3518T:p.P1173L             | 15 | 65676582  | 65676582  | G | A   | 0,31 | 0,00 | 0,00 | 0,00 | 0,00 | 0,00 |
| exonic | MAP2K1              | nonframeshift insertion | NM_002755:c.162_163insAGA:p.L54delinsLR | 15 | 66727446  | 66727446  | - | AGA | 0,00 | 0,00 | 0,00 | 0,00 | 0,13 | 0,00 |
| exonic | C15orf40            | nonsynonymous SNV       | NM_001160113:c.T481G:p.Y161D            | 15 | 83677185  | 83677185  | A | C   | 0,00 | 0,09 | 0,38 | 0,07 | 0,00 | 0,08 |
| exonic | ADAMTSL3            | stopgain SNV            | NM_207517:c.C3478T:p.Q1160X             | 15 | 84651858  | 84651858  | C | T   | 0,28 | 0,39 | 0,44 | 0,23 | 0,00 | 0,22 |
| exonic | ALPK3               | nonsynonymous SNV       | NM_020778:c.G1733A:p.R578Q              | 15 | 85383637  | 85383637  | G | A   | 0,35 | 0,35 | 0,40 | 0,00 | 0,00 | 0,32 |
| exonic | ABCA3               | nonsynonymous SNV       | NM_001089:c.G175A:p.G59S                | 16 | 2376155   | 2376155   | C | T   | 0,00 | 0,17 | 0,34 | 0,09 | 0,16 | 0,18 |
| exonic | RFXO1               | nonsynonymous SNV       | NM_145891:c.C1079T:p.A360V              | 16 | 7759078   | 7759078   | C | T   | 0,20 | 0,35 | 0,35 | 0,08 | 0,19 | 0,16 |
| exonic | SNX29               | nonsynonymous SNV       | NM_032167:c.G1510A:p.A504T              | 16 | 12223530  | 12223530  | G | A   | 0,35 | 0,43 | 0,60 | 0,25 | 0,25 | 0,27 |
| exonic | BFAR                | nonsynonymous SNV       | NM_016561:c.C793T:p.P265S               | 16 | 14755758  | 14755758  | C | T   | 0,23 | 0,29 | 0,39 | 0,21 | 0,15 | 0,26 |
| exonic | DNAH3               | nonsynonymous SNV       | NM_017539:c.G10913A:p.G3638E            | 16 | 20966293  | 20966293  | C | T   | 0,24 | 0,36 | 0,30 | 0,13 | 0,18 | 0,22 |
| exonic | DNAH3               | nonsynonymous SNV       | NM_017539:c.G10912A:p.G3638R            | 16 | 20966294  | 20966294  | C | T   | 0,26 | 0,36 | 0,30 | 0,13 | 0,18 | 0,21 |
| exonic | HS3ST2              | nonsynonymous SNV       | NM_006043:c.C1015T:p.P339S              | 16 | 22926794  | 22926794  | C | T   | 0,27 | 0,33 | 0,35 | 0,08 | 0,16 | 0,15 |
| exonic | SCNN1G              | nonsynonymous SNV       | NM_001039:c.C1690T:p.R564C              | 16 | 23226530  | 23226530  | C | T   | 0,21 | 0,39 | 0,31 | 0,19 | 0,16 | 0,18 |
| exonic | AQP8                | nonsynonymous SNV       | NM_001169:c.G749A:p.G250E               | 16 | 25239776  | 25239776  | G | A   | 0,15 | 0,35 | 0,39 | 0,11 | 0,36 | 0,15 |
| exonic | APOBR               | nonsynonymous SNV       | NM_018690:c.G1083C:p.E361D              | 16 | 28507445  | 28507445  | G | C   | 0,00 | 0,29 | 0,07 | 0,00 | 0,29 | 0,13 |
| exonic | SLC12A3             | nonsynonymous SNV       | NM_000339:c.C2516T:p.T839I              | 16 | 56926934  | 56926934  | C | T   | 0,00 | 0,00 | 0,00 | 0,00 | 0,00 | 0,19 |
| exonic | ELMO3               | nonsynonymous SNV       | NM_024712:c.C1840A:p.L614M              | 16 | 67237027  | 67237027  | C | A   | 0,00 | 0,44 | 0,00 | 0,00 | 0,00 | 0,00 |
| exonic | TCF25               | nonsynonymous SNV       | NM_014972:c.A35G:p.E12G                 | 16 | 89940110  | 89940110  | A | G   | 0,15 | 0,12 | 0,05 | 0,12 | 0,32 | 0,06 |
| exonic | C16orf3             | nonsynonymous SNV       | NM_001214:c.T131C:p.V44A                | 16 | 90095620  | 90095620  | A | G   | 0,21 | 0,00 | 0,00 | 0,00 | 0,00 | 0,14 |
| exonic | ZZEF1               | nonsynonymous SNV       | NM_015113:c.G8857C:p.A2953P             | 17 | 3910213   | 3910213   | C | G   | 0,29 | 0,07 | 0,20 | 0,09 | 0,17 | 0,11 |
| exonic | POLR2A              | nonsynonymous SNV       | NM_000937:c.T5065A:p.S1689T             | 17 | 7416648   | 7416648   | T | A   | 0,00 | 0,00 | 0,21 | 0,27 | 0,15 | 0,00 |
| exonic | POLR2A              | nonsynonymous SNV       | NM_000937:c.C5066G:p.S1689C             | 17 | 7416649   | 7416649   | C | G   | 0,00 | 0,00 | 0,21 | 0,29 | 0,17 | 0,00 |
| exonic | POLR2A              | nonsynonymous SNV       | NM_000937:c.G5072A:p.S1691N             | 17 | 7416655   | 7416655   | G | A   | 0,00 | 0,00 | 0,23 | 0,22 | 0,17 | 0,00 |
| exonic | POLR2A              | nonsynonymous SNV       | NM_000937:c.T5098A:p.S1700T             | 17 | 7416681   | 7416681   | T | A   | 0,06 | 0,00 | 0,25 | 0,06 | 0,27 | 0,09 |
| exonic | POLR2A              | stopgain SNV            | NM_000937:c.C5099G:p.S1700X             | 17 | 7416682   | 7416682   | C | G   | 0,06 | 0,00 | 0,15 | 0,00 | 0,19 | 0,09 |
| exonic | POLR2A              | nonsynonymous SNV       | NM_000937:c.T5119A:p.S1707T             | 17 | 7416702   | 7416702   | T | A   | 0,00 | 0,00 | 0,21 | 0,09 | 0,27 | 0,10 |
| exonic | POLR2A              | nonsynonymous SNV       | NM_000937:c.C5120G:p.S1707W             | 17 | 7416703   | 7416703   | C | G   | 0,00 | 0,00 | 0,13 | 0,03 | 0,10 | 0,05 |
| exonic | POLR2A              | nonsynonymous SNV       | NM_000937:c.T5149A:p.S1717T             | 17 | 7416732   | 7416732   | T | A   | 0,00 | 0,00 | 0,20 | 0,00 | 0,16 | 0,05 |
| exonic | POLR2A              | nonsynonymous SNV       | NM_000937:c.C5150G:p.S1717C             | 17 | 7416733   | 7416733   | C | G   | 0,00 | 0,00 | 0,20 | 0,00 | 0,16 | 0,05 |
| exonic | POLR2A              | nonsynonymous SNV       | NM_000937:c.G5156A:p.S1719N             | 17 | 7416739   | 7416739   | G | A   | 0,00 | 0,00 | 0,17 | 0,00 | 0,13 | 0,05 |
| exonic | CYB5D1              | nonsynonymous SNV       | NM_144607:c.A274T:p.R92W                | 17 | 7761960   | 7761960   | A | T   | 0,26 | 0,45 | 0,33 | 0,20 | 0,33 | 0,27 |
| exonic | MYH4                | nonsynonymous SNV       | NM_017533:c.G5435A:p.G1812E             | 17 | 10348324  | 10348324  | C | T   | 0,16 | 0,30 | 0,29 | 0,08 | 0,15 | 0,17 |

|        |         |                      |                                            |    |          |          |   |         |      |      |      |      |      |      |
|--------|---------|----------------------|--------------------------------------------|----|----------|----------|---|---------|------|------|------|------|------|------|
| exonic | SHISA6  | nonsynonymous SNV    | NM_001173461:c.C1247T:p.P416L              | 17 | 11461365 | 11461365 | C | T       | 0,13 | 0,50 | 0,44 | 0,43 | 0,17 | 0,25 |
| exonic | KCNH4   | nonsynonymous SNV    | NM_012285:c.C869T:p.S290F                  | 17 | 40327715 | 40327715 | G | A       | 0,09 | 0,44 | 0,34 | 0,16 | 0,09 | 0,24 |
| exonic | BCAS3   | nonsynonymous SNV    | NM_017679:c.C1901T:p.S634L                 | 17 | 59115388 | 59115388 | C | T       | 0,14 | 0,47 | 0,42 | 0,19 | 0,22 | 0,12 |
| exonic | SDK2    | nonsynonymous SNV    | NM_001144952:c.C4511T:p.A1504V             | 17 | 71382044 | 71382044 | G | A       | 0,00 | 0,36 | 0,00 | 0,00 | 0,00 | 0,00 |
| exonic | FBF1    | nonsynonymous SNV    | NM_001080542:c.C2711G:p.A904G              | 17 | 73910886 | 73910886 | G | C       | 0,20 | 0,75 | 0,20 | 0,43 | 0,09 | 0,20 |
| exonic | SEC14L1 | frameshift insertion | NM_001039573:c.c.100_101insCGATGTT:p.P34fs | 17 | 75186921 | 75186921 | - | CGATGTT | 0,09 | 0,16 | 0,32 | 0,08 | 0,06 | 0,14 |
| exonic | ENGASE  | nonsynonymous SNV    | NM_001042573:c.C1541T:p.T514I              | 17 | 77080718 | 77080718 | C | T       | 0,00 | 0,41 | 0,28 | 0,16 | 0,12 | 0,13 |
| exonic | LRRC30  | nonsynonymous SNV    | NM_001105581:c.G64A:p.G22R                 | 18 | 7231200  | 7231200  | G | A       | 0,00 | 0,35 | 0,37 | 0,24 | 0,11 | 0,22 |
| exonic | ANKRD12 | nonsynonymous SNV    | NM_001083625:c.A2467C:p.K823Q              | 18 | 9255801  | 9255801  | A | C       | 0,00 | 0,00 | 0,05 | 0,00 | 0,02 | 0,19 |
| exonic | DSC3    | nonsynonymous SNV    | NM_001941:c.G2176A:p.D726N                 | 18 | 28581643 | 28581643 | C | T       | 0,23 | 0,35 | 0,31 | 0,08 | 0,12 | 0,22 |
| exonic | CDH20   | nonsynonymous SNV    | NM_031891:c.C353T:p.A118V                  | 18 | 59166525 | 59166525 | C | T       | 0,20 | 0,32 | 0,33 | 0,16 | 0,19 | 0,22 |
| exonic | CDH7    | nonsynonymous SNV    | NM_004361:c.G307A:p.D103N                  | 18 | 63477036 | 63477036 | G | A       | 0,25 | 0,30 | 0,23 | 0,26 | 0,07 | 0,24 |
| exonic | NFATC1  | nonsynonymous SNV    | NM_006162:c.A1175C:p.H392P                 | 18 | 77171450 | 77171450 | A | C       | 0,21 | 0,44 | 0,18 | 0,40 | 0,14 | 0,39 |
| exonic | APC2    | nonsynonymous SNV    | NM_005883:c.G2863A:p.E955K                 | 19 | 1466163  | 1466163  | G | A       | 0,00 | 0,00 | 0,00 | 0,00 | 0,00 | 0,50 |
| exonic | LMNB2   | nonsynonymous SNV    | NM_032737:c.G568A:p.G190S                  | 19 | 2438277  | 2438277  | C | T       | 0,00 | 0,62 | 0,40 | 0,15 | 0,44 | 0,15 |
| exonic | STAP2   | nonsynonymous SNV    | NM_001013841:c.C902T:p.P301L               | 19 | 4325470  | 4325470  | G | A       | 0,00 | 0,20 | 0,46 | 0,18 | 0,20 | 0,17 |
| exonic | PLIN4   | nonsynonymous SNV    | NM_001080400:c.G2350A:p.A784T              | 19 | 4511580  | 4511580  | C | T       | 0,18 | 0,11 | 0,13 | 0,12 | 0,15 | 0,08 |
| exonic | KHSRP   | nonsynonymous SNV    | NM_003685:c.C1649T:p.T550I                 | 19 | 6415857  | 6415857  | G | A       | 0,50 | 0,00 | 0,00 | 0,00 | 0,00 | 0,00 |
| exonic | LRRC8E  | nonsynonymous SNV    | NM_001268285:c.T1745C:p.L582P              | 19 | 7965539  | 7965539  | T | C       | 0,20 | 0,35 | 0,12 | 0,19 | 0,08 | 0,35 |
| exonic | MAP2K7  | nonsynonymous SNV    | NM_145185:c.C461T:p.S154F                  | 19 | 7975351  | 7975351  | C | T       | 0,23 | 0,25 | 0,43 | 0,17 | 0,31 | 0,28 |
| exonic | MYO1F   | nonsynonymous SNV    | NM_012335:c.C86T:p.T29I                    | 19 | 8620598  | 8620598  | G | A       | 0,33 | 0,52 | 0,54 | 0,08 | 0,20 | 0,30 |
| exonic | MUC16   | nonsynonymous SNV    | NM_024690:c.G19439A:p.G6480E               | 19 | 9068007  | 9068007  | C | T       | 0,29 | 0,29 | 0,33 | 0,12 | 0,05 | 0,21 |
| exonic | KRI1    | nonsynonymous SNV    | NM_023008:c.C668T:p.S223F                  | 19 | 10671692 | 10671692 | G | A       | 0,33 | 0,33 | 0,56 | 0,22 | 0,09 | 0,20 |
| exonic | TECR    | nonsynonymous SNV    | NM_138501:c.C827A:p.T276N                  | 19 | 14676583 | 14676583 | C | A       | 0,00 | 0,36 | 0,00 | 0,00 | 0,00 | 0,00 |
| exonic | CYP4F12 | nonsynonymous SNV    | NM_023944:c.T639G:p.H213Q                  | 19 | 15793312 | 15793312 | T | G       | 0,00 | 0,00 | 0,16 | 0,00 | 0,00 | 0,00 |
| exonic | CPAMD8  | nonsynonymous SNV    | NM_015692:c.C4061A:p.A1354D                | 19 | 17017869 | 17017869 | G | T       | 0,00 | 0,00 | 0,18 | 0,40 | 0,00 | 0,13 |
| exonic | PBX4    | stopgain SNV         | NM_025245:c.C1048T:p.Q350X                 | 19 | 19672911 | 19672911 | G | A       | 0,00 | 0,00 | 0,00 | 0,00 | 0,80 | 0,00 |
| exonic | ZNF91   | nonsynonymous SNV    | NM_003430:c.G3534C:p.M1178I                | 19 | 23542247 | 23542247 | C | G       | 0,00 | 0,08 | 0,12 | 0,19 | 0,11 | 0,07 |
| exonic | ATP4A   | nonsynonymous SNV    | NM_000704:c.G2686A:p.G896R                 | 19 | 36044004 | 36044004 | C | T       | 0,19 | 0,42 | 0,26 | 0,21 | 0,21 | 0,25 |
| exonic | MLL4    | nonsynonymous SNV    | NM_014727:c.G6546C:p.E2182D                | 19 | 36223996 | 36223996 | G | C       | 0,38 | 0,13 | 0,29 | 0,31 | 0,22 | 0,26 |
| exonic | ZNF527  | nonsynonymous SNV    | NM_032453:c.C902T:p.P301L                  | 19 | 37879853 | 37879853 | C | T       | 0,10 | 0,03 | 0,02 | 0,11 | 0,02 | 0,01 |
| exonic | WDR87   | nonsynonymous SNV    | NM_031951:c.G5092A:p.E1698K                | 19 | 38379102 | 38379102 | C | T       | 0,27 | 0,23 | 0,40 | 0,14 | 0,07 | 0,19 |
| exonic | RASGRP4 | nonsynonymous SNV    | NM_001146206:c.G974A:p.G325E               | 19 | 38903451 | 38903451 | C | T       | 0,10 | 0,53 | 0,31 | 0,13 | 0,29 | 0,22 |
| exonic | PRX     | nonsynonymous SNV    | NM_181882:c.C2228T:p.P743L                 | 19 | 40902031 | 40902031 | G | A       | 0,30 | 0,41 | 0,25 | 0,14 | 0,15 | 0,25 |
| exonic | PRX     | nonsynonymous SNV    | NM_020956:c.T50G:p.V17G                    | 19 | 40909747 | 40909747 | A | C       | 0,40 | 0,00 | 0,33 | 0,14 | 0,29 | 0,36 |
| exonic | TOMM40  | nonsynonymous SNV    | NM_001128917:c.C428T:p.P143L               | 19 | 45396179 | 45396179 | C | T       | 0,27 | 0,46 | 0,28 | 0,13 | 0,11 | 0,21 |
| exonic | GLTSCR2 | nonsynonymous SNV    | NM_015710:c.C1289A:p.T430N                 | 19 | 48259072 | 48259072 | C | A       | 0,00 | 0,50 | 0,00 | 0,00 | 0,00 | 0,00 |
| exonic | SPIB    | nonsynonymous SNV    | NM_001243998:c.C68T:p.T23I                 | 19 | 50926863 | 50926863 | C | T       | 0,00 | 0,30 | 0,27 | 0,00 | 0,20 | 0,23 |
| exonic | FPR1    | nonsynonymous SNV    | NM_002029:c.C257T:p.A86V                   | 19 | 52249991 | 52249991 | G | A       | 0,08 | 0,38 | 0,30 | 0,26 | 0,09 | 0,23 |
| exonic | ZNF880  | nonsynonymous SNV    | NM_001145434:c.A1133G:p.K378R              | 19 | 52887966 | 52887966 | A | G       | 0,01 | 0,09 | 0,11 | 0,03 | 0,06 | 0,01 |
| exonic | ZNF534  | nonsynonymous SNV    | NM_001143938:c.G392A:p.G131E               | 19 | 52941105 | 52941105 | G | A       | 0,24 | 0,40 | 0,32 | 0,17 | 0,09 | 0,19 |
| exonic | SGK110  | nonsynonymous SNV    | NM_001199824:c.G490A:p.V164I               | 19 | 56052802 | 56052802 | C | T       | 1,00 | 0,00 | 0,00 | 0,00 | 0,00 | 0,00 |
| exonic | ZSCAN5B | nonsynonymous SNV    | NM_001080456:c.C736T:p.P246S               | 19 | 56702209 | 56702209 | G | A       | 0,24 | 0,26 | 0,39 | 0,19 | 0,07 | 0,21 |
| exonic | ZNF671  | nonsynonymous SNV    | NM_024833:c.C1452G:p.C484W                 | 19 | 58232002 | 58232002 | G | C       | 0,00 | 0,00 | 0,03 | 0,00 | 0,13 | 0,01 |
| exonic | ZNF671  | frameshift insertion | NM_024833:c.1449_1450insAT:p.K483fs        | 19 | 58232005 | 58232005 | - | AT      | 0,00 | 0,00 | 0,04 | 0,00 | 0,16 | 0,03 |
| exonic | ZNF671  | stopgain SNV         | NM_024833:c.T1437A:p.Y479X                 | 19 | 58232017 | 58232017 | A | T       | 0,00 | 0,01 | 0,03 | 0,00 | 0,19 | 0,03 |
| exonic | ZNF671  | nonsynonymous SNV    | NM_024833:c.C1433T:p.P478L                 | 19 | 58232021 | 58232021 | G | A       | 0,00 | 0,01 | 0,03 | 0,00 | 0,18 | 0,02 |
| exonic | TGM6    | nonsynonymous SNV    | NM_001254734:c.G458A:p.R153K               | 20 | 2377185  | 2377185  | G | A       | 0,18 | 0,28 | 0,32 | 0,24 | 0,12 | 0,24 |
| exonic | CHGB    | nonsynonymous SNV    | NM_001819:c.C899T:p.P300L                  | 20 | 5903689  | 5903689  | C | T       | 0,31 | 0,33 | 0,37 | 0,33 | 0,26 | 0,10 |
| exonic | HAO1    | nonsynonymous SNV    | NM_017545:c.G304A:p.G102R                  | 20 | 7895052  | 7895052  | C | T       | 0,00 | 0,22 | 0,36 | 0,16 | 0,21 | 0,13 |
| exonic | PTPRR   | nonsynonymous SNV    | NM_007050:c.C1688T:p.S563F                 | 20 | 40980798 | 40980798 | G | A       | 0,14 | 0,29 | 0,17 | 0,20 | 0,06 | 0,16 |
| exonic | PHACTR3 | nonsynonymous SNV    | NM_001199505:c.G659A:p.R220K               | 20 | 58342367 | 58342367 | G | A       | 0,12 | 0,33 | 0,48 | 0,09 | 0,18 | 0,19 |
| exonic | BTG3    | nonsynonymous SNV    | NM_001130914:c.C392T:p.A131V               | 21 | 18976514 | 18976514 | G | A       | 0,00 | 0,06 | 0,19 | 0,12 | 0,09 | 0,07 |
| exonic | BTG3    | nonsynonymous SNV    | NM_001130914:c.C345G:p.C115W               | 21 | 18976561 | 18976561 | G | C       | 0,00 | 0,00 | 0,18 | 0,20 | 0,14 | 0,00 |
| exonic | JAM2    | nonsynonymous SNV    | NM_001270408:c.A901G:p.K301E               | 21 | 27086579 | 27086579 | A | G       | 0,00 | 0,02 | 0,14 | 0,04 | 0,09 | 0,02 |

|        |                      |                        |                                      |    |           |           |     |   |      |      |      |      |      |      |
|--------|----------------------|------------------------|--------------------------------------|----|-----------|-----------|-----|---|------|------|------|------|------|------|
| exonic | DYRK1A               | nonsynonymous SNV      | NM_001396:c.G454A:p.G152R            | 21 | 38853066  | 38853066  | G   | A | 0,00 | 0,02 | 0,00 | 0,00 | 0,00 | 0,11 |
| exonic | LCA5L                | nonsynonymous SNV      | NM_152505:c.T2003A:p.I668K           | 21 | 40777818  | 40777818  | A   | T | 0,00 | 0,00 | 0,24 | 0,00 | 0,00 | 0,00 |
| exonic | SLC19A1              | nonsynonymous SNV      | NM_001205206:c.C1349T:p.A450V        | 21 | 46935011  | 46935011  | G   | A | 0,00 | 0,00 | 0,00 | 0,00 | 0,44 | 0,00 |
| exonic | SLC19A1              | nonframeshift deletion | NM_001205207:c.214_216del:p.72_72del | 21 | 46951916  | 46951918  | CAG | - | 0,00 | 0,26 | 0,00 | 0,00 | 0,15 | 0,00 |
| exonic | IL2RB                | nonsynonymous SNV      | NM_000878:c.C1391T:p.P464L           | 22 | 37524401  | 37524401  | G   | A | 0,43 | 0,59 | 0,28 | 0,07 | 0,13 | 0,42 |
| exonic | CACNA1I              | nonsynonymous SNV      | NM_001003406:c.C4825A:p.L1609M       | 22 | 40073421  | 40073421  | C   | A | 0,00 | 0,00 | 0,00 | 0,00 | 0,00 | 0,27 |
| exonic | SLC25A17             | nonsynonymous SNV      | NM_006358:c.C665T:p.P222L            | 22 | 41173072  | 41173072  | G   | A | 0,15 | 0,38 | 0,29 | 0,27 | 0,26 | 0,16 |
| exonic | TCF20                | nonframeshift deletion | NM_005650:c.534_536del:p.178_179del  | 22 | 42610776  | 42610778  | TGC | - | 0,00 | 0,15 | 0,00 | 0,02 | 0,02 | 0,02 |
| exonic | ARHGAP8,PRR5-ARHGAP8 | nonsynonymous SNV      | NM_181335:c.C1207T:p.P403S           | 22 | 45258380  | 45258380  | C   | T | 0,28 | 0,20 | 0,26 | 0,26 | 0,17 | 0,31 |
| exonic | PKDREJ               | stopgain SNV           | NM_006071:c.G4742A:p.W1581X          | 22 | 46654478  | 46654478  | C   | T | 0,21 | 0,00 | 0,00 | 0,00 | 0,00 | 0,00 |
| exonic | ACR                  | nonsynonymous SNV      | NM_001097:c.G394A:p.E132K            | 22 | 51178234  | 51178234  | G   | A | 0,26 | 0,35 | 0,37 | 0,10 | 0,22 | 0,20 |
| exonic | EFNB1                | nonsynonymous SNV      | NM_004429:c.G461A:p.R154H            | X  | 68059561  | 68059561  | G   | A | 0,00 | 0,00 | 0,00 | 0,40 | 0,00 | 0,00 |
| exonic | MED12                | nonsynonymous SNV      | NM_005120:c.C5326A:p.P1776T          | X  | 70356431  | 70356431  | C   | A | 0,00 | 0,57 | 0,00 | 0,00 | 0,00 | 0,00 |
| exonic | CYLC1                | nonsynonymous SNV      | NM_021118:c.C1139A:p.A380E           | X  | 83128855  | 83128855  | C   | A | 0,00 | 0,00 | 0,04 | 0,00 | 0,06 | 0,27 |
| exonic | COL4A5               | nonsynonymous SNV      | NM_000495:c.G4306A:p.G1436S          | X  | 107930720 | 107930720 | G   | A | 0,51 | 0,63 | 0,59 | 0,30 | 0,40 | 0,41 |
| exonic | ATP11C               | nonsynonymous SNV      | NM_001010986:c.A2417G:p.K806R        | X  | 138845561 | 138845561 | T   | C | 0,00 | 0,00 | 0,00 | 0,00 | 0,17 | 0,00 |
| exonic | MAGEC1               | nonsynonymous SNV      | NM_005462:c.C767G:p.T256S            | X  | 140993957 | 140993957 | C   | G | 0,00 | 0,10 | 0,11 | 0,16 | 0,07 | 0,12 |
| exonic | MAGEC1               | nonsynonymous SNV      | NM_005462:c.T774A:p.S258R            | X  | 140993964 | 140993964 | T   | A | 0,00 | 0,11 | 0,12 | 0,20 | 0,09 | 0,13 |
| exonic | MAGEC1               | nonsynonymous SNV      | NM_005462:c.T779C:p.F260S            | X  | 140993969 | 140993969 | T   | C | 0,00 | 0,13 | 0,14 | 0,22 | 0,10 | 0,16 |
| exonic | MAGEC1               | nonsynonymous SNV      | NM_005462:c.C820T:p.P274S            | X  | 140994010 | 140994010 | C   | T | 0,00 | 0,12 | 0,30 | 0,19 | 0,20 | 0,14 |
| exonic | SLITRK4              | nonsynonymous SNV      | NM_001184749:c.A458G:p.K153R         | X  | 142718467 | 142718467 | T   | C | 0,49 | 0,65 | 0,72 | 0,30 | 0,31 | 0,46 |
| exonic | PLXNB3               | nonsynonymous SNV      | NM_005393:c.G295A:p.V99M             | X  | 153032577 | 153032577 | G   | A | 0,00 | 0,22 | 0,00 | 0,33 | 0,00 | 0,00 |
