# Supplementary material for: Intra- and inter-tumor heterogeneity in a vemurafenib-resistant melanoma patient and derived xenografts
Source: PubMed Central journal article supplement (PMC4568946; doi:10.15252/emmm.201404914), 2015-06-23

Source data for Figure 4

C.

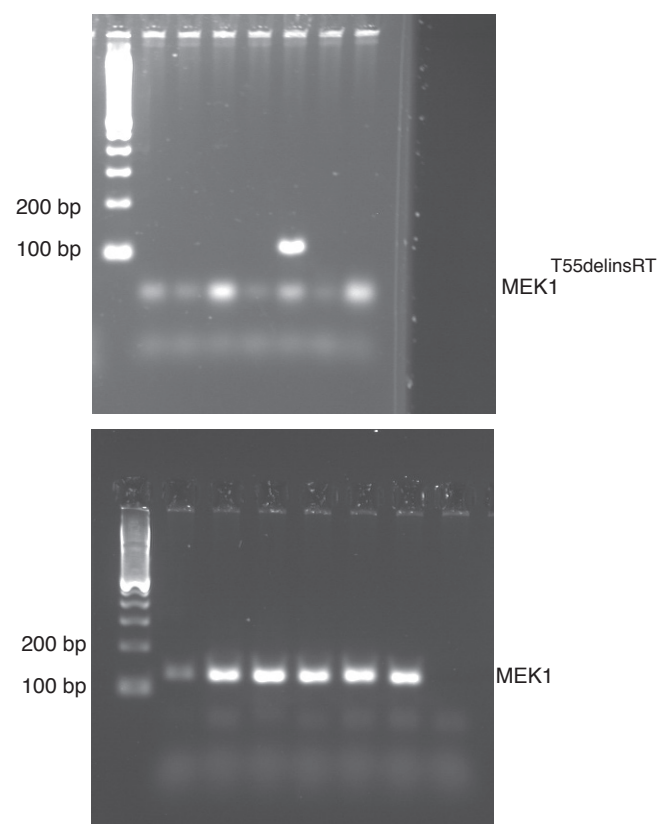

D.

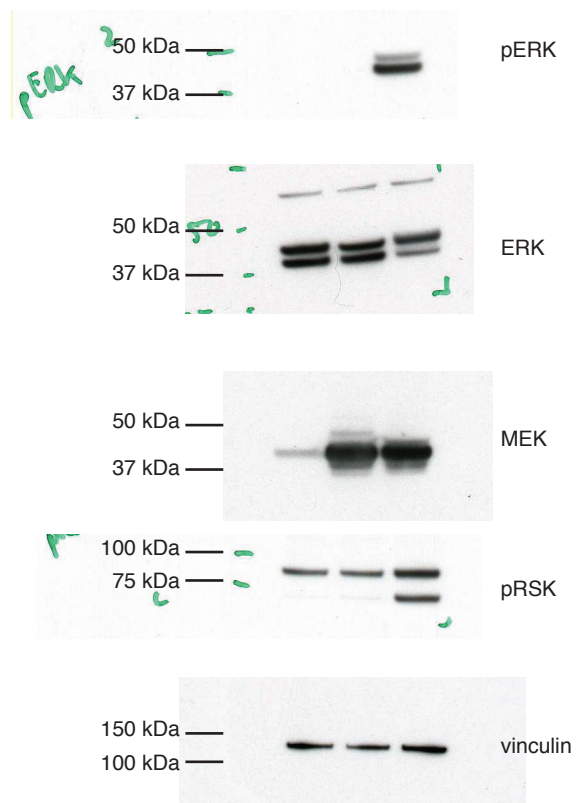

E.

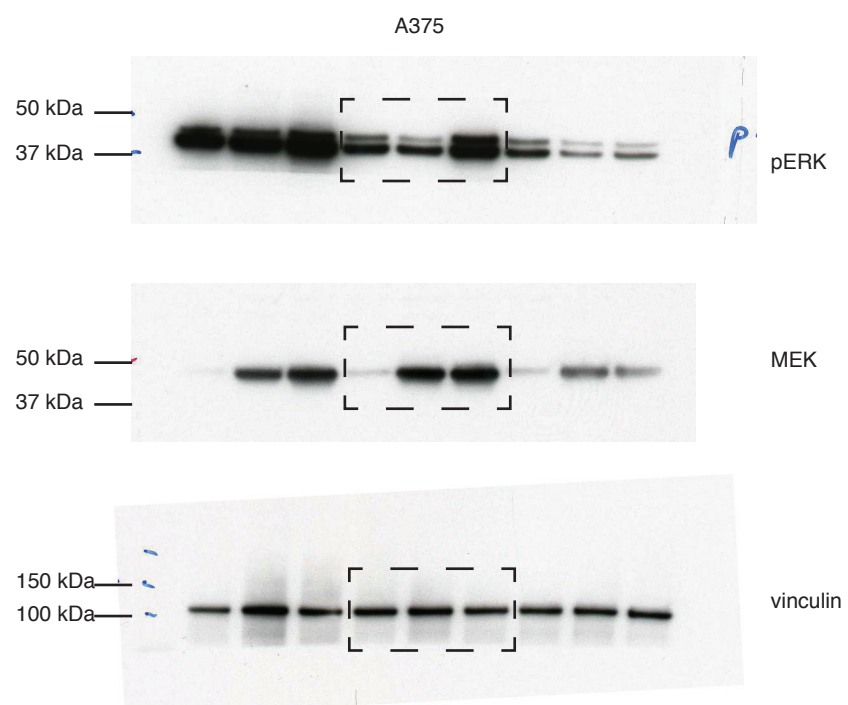

Supplement: emmm0007-1104-sd4.pdf [file emmm0007-1104-sd4.pdf]
